Submitted to *EMBO J*

1  
2  
3  
4  
5  
6  
7  
8  
9  
10  
11  
12  
13  
14  
15  
16  
17  
18  
19  
20  
21  
22

**$\alpha$ -Actinin-1 promotes activity of the L-type Ca<sup>2+</sup> Channel Cav1.2**

Matthew Turner<sup>1§</sup>, David E. Anderson<sup>1§</sup>, Madeline Nieves-Cintrón<sup>2§</sup>, Peter Bartels<sup>2§</sup>, Andrea M. Coleman<sup>1,2</sup>, Peter B. Henderson<sup>2</sup>, Kwun Nok Mimi Man<sup>2</sup>, Vladimir Yarov-Yarovoy<sup>3</sup>, Donald M. Bers<sup>2</sup>, Manuel F. Navedo<sup>2</sup>, Mary C. Horne<sup>2#</sup>, James B. Ames<sup>1#</sup>, and Johannes W. Hell<sup>2#</sup>

<sup>1</sup>Department of Chemistry, <sup>2</sup>Department of Pharmacology, and <sup>3</sup>Department of Physiology and Membrane Biology, University of California, Davis, CA 95616, USA.

Running title:  *$\alpha$ -Actinin-1 promotes Cav1.2 gating*

Number of Figures: 7

§ These authors are equal first authors.

# Co-corresponding Authors

Contact information : [mhorne@ucdavis.edu](mailto:mhorne@ucdavis.edu) ; [jbames@ucdavis.edu](mailto:jbames@ucdavis.edu) ; [jwhell@ucdavis.edu](mailto:jwhell@ucdavis.edu)

Lead contact : [jwhell@ucdavis.edu](mailto:jwhell@ucdavis.edu)

Keywords : calmodulin, IQ motif structure, open probability, gating charge, surface expression

23 **ABSTRACT**

24 The L-type  $\text{Ca}^{2+}$  channel Cav1.2 governs gene expression, cardiac contraction, and neuronal  
25 activity. Binding of  $\alpha$ -actinin to the IQ motif of Cav1.2 supports its surface localization and  
26 postsynaptic targeting in neurons. We report a bi-functional mechanism that restricts Cav1.2  
27 activity to its target sites. We solved separate NMR structures of the IQ motif (residues 1646-  
28 1664) bound to  $\alpha$ -actinin-1 and to apo-calmodulin (apoCaM). The Cav1.2 K1647A and Y1649A  
29 mutations, which impair  $\alpha$ -actinin-1 but not apoCaM binding, but not the F1658A and K1662E  
30 mutations, which impair apoCaM but not  $\alpha$ -actinin-1 binding, decreased single channel open  
31 probability, gating charge movement, and its coupling to channel opening. Thus,  $\alpha$ -actinin  
32 recruits Cav1.2 to defined surface regions and simultaneously boosts its open probability so that  
33 Cav1.2 is mostly active when appropriately localized.

34

35 **INTRODUCTION**

36  $\text{Ca}^{2+}$  influx through Cav1.2 is critical for the functions of many organs as strikingly illustrated by  
37 Timothy syndrome (Splawski et al., 2004). In this disease a point mutation in Cav1.2 causes,  
38 among other symptoms, lethal arrhythmias, autistic-like behaviors, immune deficiency, and  
39 webbing of fingers (Splawski et al., 2004). Cav1.2 is the main L-type channel in heart  
40 (Seisenberger et al., 2000), vascular smooth muscle cells (Ghosh et al., 2017), and brain (Hell et  
41 al., 1993, Sinnegger-Brauns et al., 2004).  $\text{Ca}^{2+}$  influx through Cav1.2 triggers cardiac  
42 contraction, regulates arterial tone (Ghosh et al., 2017), mediates different forms of synaptic  
43 long-term potentiation (Grover and Teyler, 1990, Patriarchi et al., 2016, Qian et al., 2017), and  
44 controls neuronal excitability (Berkefeld et al., 2006, Marrion and Tavalin, 1998). Furthermore,  
45 L-type channels are much more strongly coupled to gene expression than other  $\text{Ca}^{2+}$  channels

46 (Cohen et al., 2018, Dolmetsch et al., 2001, Li et al., 2012, Ma et al., 2014). Finally, Cav1.2  
47 forms a physical and functional complex with the  $\beta_2$  adrenergic receptor (Davare et al., 2001)  
48 making it a prime target for signaling by norepinephrine (Patriarchi et al., 2016, Qian et al.,  
49 2017), which is important for wakefulness, attention, and various forms of learning (Berman and  
50 Dudai, 2001, Cahill et al., 1994, Carter et al., 2010, Hu et al., 2007, Minzenberg et al., 2008).

51  
52 Cav1.2 consists of the pore-forming  $\alpha_1$ 1.2 subunit and auxiliary  $\alpha_2\delta$  and  $\beta$  subunits, which  
53 facilitate release from the endoplasmic reticulum and the controlled trafficking of Cav1.2 to the  
54 cell surface (Dai et al., 2009, Dolphin, 2012, 2016, Ghosh et al., 2018, Zamponi et al., 2015).  
55 However,  $\alpha_2\delta$  and  $\beta$  subunits do not target Cav1.2 to specific sites in the plasma membrane.  
56 Rather, Cav1.2 anchoring at defined regions at the cell surface is mediated by  $\alpha$ -actinin, which  
57 binds to the IQ motif in the C-terminus of  $\alpha_1$ 1.2 (Hall et al., 2013, Tseng et al., 2017).

58  
59 A systematic yeast two hybrid screen defined three residues in the IQ motif of  $\alpha_1$ 1.2, whose  
60 mutations to alanine residues affect  $\alpha$ -actinin binding: K1647A, Y1649A, and I1654A. All three  
61 mutations reduced surface expression of Cav1.2 by ~35% but current density by 70-80% (Tseng  
62 et al., 2017). These results suggest that  $\alpha$ -actinin binding to the IQ motif promotes not only  
63 surface localization but also channel activity. Such a multifunctional role would ensure that  
64 Cav1.2 is mostly active at its ultimate destinations and much less so when in transit and outside  
65 its target areas.

66  
67 The closely related  $\alpha_1$ 1.3 subunit of the L-type channel Cav1.3 shares nearly 100 % sequence  
68 identity with  $\alpha_1$ 1.2 in its membrane proximal 165 residues of its C-terminus in which the IQ

69 motif is embedded (the eponymous Ile is I1654 of  $\alpha_1$ 1.2 and I1609 of  $\alpha_1$ 1.3; Suppl. Fig. 1).  $\text{Ca}^{2+}$ -  
70 free calmodulin (apoCaM) binds to this IQ motif and mutation of I1609 in  $\alpha_1$ 1.3 impairs both,  
71 apoCaM binding and open probability  $P_o$  of Cav1.3 (Adams et al., 2014, Ben Johny et al., 2013,  
72 Ben-Johny et al., 2014). We solved the NMR structures of the third and fourth EF-hands of  $\alpha$ -  
73 actinin-1 (EF3 and EF4, residues 822-892; Fig. 1A) and of full length apoCaM bound to the  $\alpha$ -  
74 helical IQ motif of Cav1.2 (residues 1646-1664). This work provided new insight into the  
75 structure of Cav1.2 especially as relevant for these two critical binding partners and informed  
76 experiments that dissected the exact functions of  $\alpha$ -actinin versus apoCaM binding. Refined  
77 analysis of Cav1.2 activity by cell attached single channel recording revealed that point  
78 mutations that affected  $\alpha$ -actinin-1 but not those that affected apoCaM binding dramatically  
79 decreased the channel  $P_o$  by impairing gating charge movement as well as its coupling to  
80 channel opening. We conclude that  $\alpha$ -actinin plays a dual role by anchoring Cav1.2 at specific  
81 subcellular domains such as the postsynaptic sites and at the same time boosting its open  
82 probability. This mechanism ensures that activity of Cav1.2 is minimal when in transit during  
83 secretory trafficking and outside its intended location at the cell surface, where its  $\text{Ca}^{2+}$   
84 conductance could adversely affect cell functions, but maximal at its final destination.

85

## 86 **RESULTS**

### 87 **Binding of $\alpha$ -actinin-1 EF3/EF4 to the Cav1.2 IQ motif**

88  $\alpha$ -actinin is encoded by four homologous genes with  $\alpha$ -actinin-1 and  $\alpha$ -actinin-2 being most  
89 prominent in neurons (Hall et al., 2013, Hell, 2014, Matt et al., 2018, Wyszynski et al., 1997).  $\alpha$ -  
90 actinins consist of two N-terminal calponin homology domains (CH1, CH2; residues 19-192),  
91 four central spectrin repeats (SR1-4), which form a rod-like coiled-coil structure (Ribeiro Ede et

92 al., 2014), and four EF hands at their C-termini (residues 750-892; Fig. 1a). We first performed  
93 NMR spectroscopy with the CH1/CH2 region (residues 19-192). Two-dimensional NMR  
94 spectra of  $^{15}\text{N}$ -labeled CH1/CH2 recorded in the presence and absence of unlabeled IQ peptide  
95 appeared to be virtually identical, consistent with a lack of IQ binding to CH1/CH2 under NMR  
96 conditions (Suppl. Fig. 2a). The lack of IQ binding to the CH1/CH2 domain is supported by  
97 absence of detectable binding measured by fluorescence polarization (see below Fig. 1f). In stark  
98 contrast, the NMR spectrum of  $^{15}\text{N}$ -labeled EF-hand domain of  $\alpha$ -actinin-1 (residues 750-892)  
99 showed clearly detectable spectral changes upon adding a saturating amount of unlabeled IQ  
100 peptide, demonstrating a binding interaction (Suppl. Fig. 2b). The NMR peaks of  $\alpha$ -actinin-1  
101 most affected by the binding of IQ (see labeled peaks in Suppl. Fig. 2b) were assigned to  
102 residues in EF3 and EF4 (the C-lobe of the EF hand region; residues 822-892). Consistently, the  
103 NMR spectrum of  $^{15}\text{N}$ -labeled  $\alpha$ -actinin-1 EF3/4 (residues 822-892) exhibited large spectral  
104 changes upon addition of the IQ peptide (Suppl. Fig. 2c), which are similar to those seen with the  
105 construct that contains all four EF-hands (Suppl. Fig. 2b). We conclude that the IQ peptide binds  
106 to the  $\alpha$ -actinin-1 C lobe.

107

### 108 **NMR Structure of $\alpha$ -actinin-1 EF3/4 bound to the IQ motif of Cav1.2**

109

110 We had previously reported NMR spectral assignments for  $\alpha$ -actinin-1 EF3/4 (BMRB accession  
111 number 25902) (Turner et al., 2016). We used these assignments to obtain NMR-derived  
112 structural restraints for high-resolution structural analysis of  $\alpha$ -actinin-1 EF3/4 bound to the  
113 Cav1.2 IQ motif (EF3/4-IQ). Atomic-level NMR structures were calculated on the basis of  
114 distance restraints derived from analysis of NOESY spectra and long-range orientational  
115 restraints derived from residual dipolar coupling (RDC) data (Suppl. Fig. 3a). EF34 in the

116 complex was resolved for 69 residues, starting at T823 and ending at L892. The 10 lowest-  
117 energy NMR structures are overlaid in Fig. 1b and structural statistics summarized in Table 1.  
118 The overall precision of the ensemble was expressed by an RMSD of 0.3 Å calculated from the  
119 coordinates of the main chain atoms. The energy-minimized average structure of EF3/4-IQ (Fig.  
120 1c, calculated from the ensembles in Fig. 1b) contained two EF-hand motifs ( $\alpha$ 1: A826 – A837;  
121  $\alpha$ 2: M845 – E851;  $\alpha$ 3: P854 – R863;  $\alpha$ 4: M880 – Y887;  $\beta$ 1: Y842 – T844;  $\beta$ 2: A876 – D878)  
122 bound to an  $\alpha$ -helical IQ motif (Cav1.2 residues 1646-1664). The NMR structure of EF3/4-IQ  
123 (Fig. 1c) was quite similar (1.8 Å RMSD) to the NMR structure of  $\alpha$ -actinin-2 bound to the  
124 seventh Z-repeat of titin (Atkinson et al., 2001). It contained important intermolecular contacts  
125 that stabilize the EF3/4 – IQ interaction (Fig. 1c-e). Most striking were a salt bridge between IQ  
126 K1647 and EF3/4 E847/E851 (Fig. 1c) and hydrophobic contacts involving IQ I1654 and EF3  
127 F833 (Fig. 1d). The IQ residue F1658 was mostly solvent exposed in the EF3/4-IQ complex  
128 contributing minimally if at all to the EF3/4 – IQ interaction (Fig. 1e), in contrast to being buried  
129 inside apoCaM in the apoCaM/IQ complex (see below).

130

### 131 **Validation of the $\alpha$ -actinin-1 EF3/4 - IQ NMR structure by mutagenesis**

132 Mutations in both  $\alpha$ -actinin-1 EF3/4 and IQ peptide were designed to verify their predicted  
133 intermolecular contacts. A synthetic fluorescein-labeled IQ peptide (residues 1644-1666) was  
134 titrated with EF3/4 and fluorescence polarization (FP) monitored to determine their  $K_d$  values.  
135 The IQ peptide bound to  $\alpha$ -actinin-1 EF3/4 with nearly the same affinity as to full-length  $\alpha$ -  
136 actinin-1 (Fig. 1f; Table 2). The IQ peptide did not bind to  $\alpha$ -actinin-1 EF1/2 (Fig. 1f).  
137 Accordingly, IQ interacts exclusively with the C-lobe but not N-lobe of the EF hand domain in  
138  $\alpha$ -actinin-1.

139  
140 The salt bridges formed between IQ residue K1647 and  $\alpha$ -actinin-1 residues E847 and E851  
141 (Fig. 1c) provided an opportunity for charge inversion experiments. The single residue  
142 alterations K1647A and K1647E in the IQ peptide increased the  $K_d$  by ~5-fold and mutating  
143 E847 and E851 in  $\alpha$ -actinin-1 EF3/4 to lysine (K) by ~12-fold (Fig. 1f; Table 2). Combining the  
144 E847K/E851K mutations in  $\alpha$ -actinin-1 EF3/4 with the K1647E substitution in the IQ peptide  
145 mostly but not fully restored the binding affinity to the K1647E IQ peptide. This powerful charge  
146 inversion experiment unequivocally identified the importance of those salt bridges for the  $\alpha$ -  
147 actinin-1 – IQ interaction. Furthermore, I1654 of the IQ motif was predicted to form  
148 hydrophobic interactions with F833 in EF3 (Fig. 1d). In fact, the  $\alpha$ -actinin-1 EF3/4 mutant  
149 F833A showed an ~8-fold decrease in binding affinity, which is consistent with the decrease  
150 observed for the I1654A substitution in the IQ peptide (Fig. 1g; Table 2). These results  
151 confirmed two important intermolecular interactions that had been seen in the NMR structure  
152 (Fig. 1c): a salt bridge contact between K1647 (Cav1.2) and E847/E851 ( $\alpha$ -actinin-1) as well as  
153 the linchpin hydrophobic contact between I1654 (Cav1.2) and F833 ( $\alpha$ -actinin-1).

154

### 155 **NMR Structure of apoCaM bound to the IQ motif of Cav1.2.**

156 ApoCaM is predicted to bind to the IQ motif of Cav1.3 under basal conditions to augment Po  
157 (Adams et al., 2014) but no structure has so far been available to aid data interpretation. The  $^1\text{H}$ -  
158  $^{15}\text{N}$  HSQC NMR spectrum of  $^{15}\text{N}$ -labeled apoCaM showed detectable spectral changes upon  
159 adding a saturating amount of unlabeled IQ peptide, demonstrating binding (Suppl. Fig. 2d). The  
160 NMR peaks of apoCaM most affected by the binding of IQ (see labeled peaks in Suppl. Fig. 2d)  
161 were assigned to residues in its C lobe (CaM EF3/4). Complete NMR spectral assignments for

162 apoCaM bound to the IQ peptide had been reported previously (Lian et al., 2007). We used these  
163 assignments to obtain NMR-derived structural restraints and determine the atomic-level NMR  
164 structure of apoCaM bound to the IQ peptide (called apoCaM-IQ). NMR-derived structures  
165 were calculated on the basis of NOESY distance restraints and long-range orientational restraints  
166 derived from NMR RDC data (Suppl. Fig. 3b) (Tjandra and Bax, 1997). Our NMR chemical  
167 shift analysis indicated that the IQ peptide contacted residues in the C-lobe (residues 82-148) but  
168 not N-lobe of apoCaM (residues 1-78; Fig. 2). The 10 lowest-energy NMR structures are  
169 overlaid in Fig. 2a and structural statistics summarized in Table 3. The overall precision of the  
170 ensemble was expressed by an RMSD of 0.6 Å calculated from the coordinates of the main chain  
171 atoms. The energy-minimized average structure of apo-CaM/IQ (Fig. 2b, calculated from the  
172 ensembles in Fig. 2a) contained two EF-hand motifs (EF3 and EF4) in a semi-open conformation  
173 akin to that observed for apoCaM bound to the IQ motif in voltage-gated Na<sup>+</sup> channels (Chagot  
174 and Chazin, 2011, Feldkamp et al., 2011). This semi-open apoCaM C-lobe structure was bound  
175 to the  $\alpha$ -helical IQ motif ( $\alpha_1$ 1.2 residues 1646-1665; Fig. 2b) with an orientation that was  
176 opposite to that observed in the crystal structure of Ca<sup>2+</sup>-CaM bound to IQ (Van Petegem et al.,  
177 2005).

178  
179 The NMR-derived structure of apoCaM bound to  $\alpha_1$ 1.2 IQ peptide contained a number of  
180 important intermolecular contacts that stabilized this interaction (Fig. 2b-d). The most striking  
181 intermolecular interactions were: (1) a salt bridge between IQ residue K1662 and apoCaM  
182 residue E88 (Fig. 2b); (2) hydrophobic contacts involving the side chain atoms of IQ residue  
183 I1654 and apoCaM residue F90 (Fig. 2c); and (3) hydrophobic contacts involving the side chain  
184 atoms of IQ residue F1658 and apoCaM residues F90/M110 (Fig. 2d).



185

186 **Validation of the apoCaM - IQ NMR structure by mutagenesis**

187 Mutations in both apoCaM and IQ peptide were introduced to verify their predicted  
188 intermolecular contacts. We titrated fluorescein-labeled IQ peptide (residues 1644-1666) with  
189 apoCaM and measured FP. The  $K_d$  for WT IQ peptide was 10  $\mu$ M (Fig. 2e, Table 4), similar to  
190 the  $K_d$  of 13  $\mu$ M in earlier work (Evans et al., 2011). To understand why this  $K_d$  is ~20-fold  
191 higher than the  $K_d$  of 580 nM deducted previously from isothermal titration calorimetry (ITC)  
192 measurements (Findeisen et al., 2013), we performed ITC experiments by adding increments of  
193 apoCaM (100  $\mu$ M) to the IQ peptide (10  $\mu$ M) under near physiological salt concentration (100  
194 mM KCl, Suppl. Fig 4a). No heat signal other than that of dilution was detectable (Suppl. Fig.  
195 4b). The prior ITC experiments were performed at 5 mM KCl (Findeisen et al., 2013) and may  
196 represent a non-physiological electrostatic attraction between oppositely charged apoCaM and  
197 IQ that is suppressed by more physiological salt levels (100 mM KCl). Indeed, apoCaM binds to  
198 the IQ peptide with nearly 4-fold higher affinity in the absence of salt (Suppl. Fig. 4c;  $K_d$  is 2.6  
199  $\mu$ M at 0 KCl and 10  $\mu$ M at 100 mM KCl).

200

201 According to our FP binding assay, the K1662E mutation in the IQ peptide and the E88K  
202 mutation in apoCaM each decreased the binding affinity between IQ peptide apoCaM by more  
203 than 5-fold (Fig. 2e; Table 4). Combining the apoCaM E88K mutation with the IQ peptide  
204 alteration K1662E restored the binding affinity to some degree although not completely (Fig.  
205 2e). The apoCaM mutant F90A showed an ~3.3-fold decrease in binding affinity for WT IQ  
206 peptide (Fig. 2f; Table 4). Consistently, I1654A and F1658A substitutions in the IQ peptide  
207 resulted in a comparable reduction in their affinity for apoCaM (Fig. 2f). These results confirmed

208 three important intermolecular interactions seen in the NMR structure: (1) a salt bridge between  
209 IQ residue K1662 and apoCaM residue E88; (2) hydrophobic contact between IQ residue I1654  
210 and apoCaM residue F90; and (3) hydrophobic contact between IQ residue F1658 and apoCaM  
211 residues F90 and M110.

212

### 213 **$\alpha$ -Actinin binding to the Cav1.2 IQ motif augments open probability of individual channels**

214 Point mutations that impaired  $\alpha$ -actinin binding to the IQ motif of  $\alpha_1$ 1.2 reduced current density  
215 upon reconstitution of Cav1.2 in HEK293 cells by 70-80% but surface expression by only 35-  
216 40% as determined by two different methods (Tseng et al., 2017). We performed cell attached  
217 recordings to precisely determine single channel parameters of Cav1.2 as before (Bartels et al.,  
218 2018, Davare et al., 2001, Patriarchi et al., 2016, Qian et al., 2017). All three mutations in the IQ  
219 motif that impaired  $\alpha$ -actinin binding (Table 2) (Tseng et al., 2017), i.e., K1647A, Y1649A, and  
220 I1654A, decreased functional availability by 79-93% and overall single channel activity by ~85-  
221 92% (Fig. 3a-c; Suppl. Fig. 5, 6a,b; Table 5). Ensemble averages of each experiments were  
222 similarly decreased by 84-91% (Fig. 3b,e, Suppl. Fig. 5,6d).

223

224 The single channel activity is the product of the number (N) of channels in a patch, the open  
225 probability (Po), and unitary current amplitudes (i) of each individual channel (i.e.,  $N \cdot Po \cdot i$ ).  
226 Because i was unaffected (Suppl. Fig. 6e) the mutations must affect NPo. Given that surface  
227 expression of all three mutations decreased by only 35-40% versus WT  $\alpha_1$ 1.2 under exactly the  
228 same conditions (Tseng et al., 2017), the ~90% reduction of NPo for all three mutants to ~10%  
229 of WT Cav1.2 suggests that Po of the remaining ~60% channels is only ~ 1/6 of the Po of WT  
230 Cav1.2. These observations suggest a remarkable ~6-fold decrease in Po upon loss of  $\alpha$ -actinin

231 binding. To corroborate this notion, we determined N for each recording and derived Po for  
232 individual channels. Accordingly, Po is reduced by ~90% for individual channels carrying a  
233 K1647A, Y1649A, or I1654A mutation (Fig. 3d; Suppl. Fig. 6c; Table 5). At the same time, the  
234 F1658A and K1662E mutations, which diminish apoCaM binding, did not alter NPo.

235  
236 To further scrutinize the role of  $\alpha$ -actinin in Po of Cav1.2, Cav1.2 was co-expressed with WT  $\alpha$ -  
237 actinin-1 or its binding-deficient E847K/E851K mutant. Overexpression of WT but not  
238 E847K/E851K mutant  $\alpha$ -actinin-1 increased Po of Cav1.2 WT >2-fold from 3.4% seen with  
239 Cav1.2 alone to 7.9% (Fig. 4a,d; Suppl. Fig. 7c; Table 6). Availability, NPo, and assemble  
240 averages were also increased (Fig. 4b,c,e; Suppl. Fig. 7a,b,d; Table 6). Accordingly, in HEK293  
241 cells functional occupancy of Cav1.2 by endogenous  $\alpha$ -actinin appears to be far from complete.

242  
243 To further test whether  $\alpha$ -actinin needs to bind to the Cav1.2 IQ motif to augment Po, we used a  
244 charge inversion experiment by mutating K1647 to the negatively charged glutamyl rather than  
245 neutral alanyl residue and then attempted rescue of the expected reduction in Po by pairing  
246 expression of K1647E Cav1.2 with charge inverted E847K/E851K  $\alpha$ -actinin-1. Coexpression of  
247 K1647E mutant Cav1.2 with WT  $\alpha$ -actinin-1 yielded a low availability, NPo, Po, and ensemble  
248 average (Fig. 5; Suppl. Fig. 8; Table 6), which were well below the values observed upon  
249 expression of WT Cav1.2 alone or co-expression of WT Cav1.2 with E847K/E851K mutant  $\alpha$ -  
250 actinin-1 (Fig. 4; Table 6). The reduction in availability was statistically significantly, though not  
251 fully, rescued when K1647E mutant Cav1.2 was paired with E847K/E851K mutant rather than  
252 WT  $\alpha$ -actinin-1 (Fig. 5a; Suppl. Fig. 8a; Table 6). Po also appears to be partially rescued  
253 although the p value was 0.07 versus pairing of WT  $\alpha$ -actinin-1 with K1647E mutant Cav1.2.

254 This rescue of loss of availability and likely of Po for K1647E mutant Cav1.2 by E847K/E851K  
255 mutant  $\alpha$ -actinin-1 must be due to either enhanced opening of individual channels, a change in  
256 channel surface expression, or both. This rescue is difficult to explain by a mechanism other  
257 than that  $\alpha$ -actinin-1 binding augments channel activity, including apoCaM binding.  
258 Consistently, impairing apoCaM binding to the Cav1.2 IQ motif by mutating F1658 to Ala or  
259 K1662 to Glu had no effect on availability, NPo, Po, and did not affect ensemble averages (Fig.  
260 3; Suppl. Fig. 5, 6).

261  
262 One possibility for a reduction in Po is that K1647A, Y1649A, and I1654A shift the voltage  
263 dependence of Cav1.2 to more positive potentials such that WT channels open upon  
264 depolarization to 0 mV more readily than mutant channels. However, neither the reversal  
265 potential nor the voltage dependence of activation was significantly affected by the K1647A and  
266 Y1649A mutations and only minimally by the I1654A mutation (Suppl. Fig. 9B,C; Table 7).

267  
268 To test whether this charge-inversion rescue for the K1647E mutant promoted surface expression  
269 of Cav1.2 we performed surface biotinylation experiments (Fig. 6). As expected, co-expression  
270 of WT  $\alpha$ -actinin-1 with WT Cav1.2 increased  $\alpha_1$ 1.2 biotinylation by ~60% versus WT  $\alpha_1$ 1.2  
271 alone. Thus, WT Cav1.2 expression at the surface is enhanced by  $\alpha$ -actinin-1 (Fig. 6a). That the  
272 increase in surface expression of WT Cav1.2 by WT  $\alpha$ -actinin-1 overexpression was smaller  
273 than the increase in Po is analogous to the smaller effects of the  $\alpha_1$ 1.2 K1647A, Y1649A, and  
274 I1654A mutations on surface expression compared to charge density (Tseng et al., 2017) and the  
275 larger decrease in Po and NPo we report here (Fig. 3). Importantly, this increase in Cav1.2  
276 surface expression by  $\alpha$ -actinin-1 was lost when WT  $\alpha_1$ 1.2 was co-expressed with

277 E847K/E851K mutant  $\alpha$ -actinin-1 or K1647E mutant  $\alpha_1$ 1.2 with WT  $\alpha$ -actinin-1 (Fig. 6b).  
278 However, the charge inversion we performed by combining these mutants failed to increase  
279 surface expression of Cav1.2 to a degree that would be detectable (Fig. 6b). This result is in  
280 contrast to our findings that K1647E  $\alpha_1$ 1.2 availability and likely Po was partially rescued by the  
281 E847K/E851K  $\alpha$ -actinin-1 charge reversal (Fig. 5). It is conceivable that a small rescue effect  
282 did occur but was indiscernible for statistical reasons as 95% confidence intervals (CIs) are  
283 larger than a potentially partial rescue of, e.g., 30% of the impairment of ~50% by the K1647E  
284 mismatch with WT  $\alpha$ -actinin-1 (Suppl. Table 1; a 30% rescue would translate into only an ~15%  
285 increase in surface expression).

286

287  **$\alpha$ -Actinin binding to the Cav1.2 IQ motif augments gating charge movement as well as its**  
288 **coupling to channel opening**

289 To test the molecular mechanism underlying the  $\alpha$ -actinin-induced increase in Po in more detail  
290 we analyzed gating charge movement at the Ba<sup>2+</sup> current reversal potential (Fig. 7) by whole-cell  
291 patch clamp recording. This approach measures all of the Ca<sup>2+</sup> channels on the surface, thereby  
292 ruling out any potential limitation caused by the channel selection inherent in the cell-attached  
293 patch recordings in Figs. 3-5. The K1647A, Y1649A, and I1654A mutations reduced gating  
294 currents (Q<sub>on</sub>) by 66-77% (Fig. 7a,b,d; Suppl. Fig. 9a; Table 7) suggesting that  $\alpha$ -actinin fosters  
295 gating charge movement. This reduction is stronger than the reduction in surface expression  
296 (Tseng et al., 2017) but not quite as strong as the 90% reduction in NPo for these mutants (Fig.  
297 5). Thus, we investigated whether  $\alpha$ -actinin also augments coupling of gating charge movement  
298 to channel opening. We analyzed the relationship of tail currents (I<sub>tail</sub>) to Q<sub>on</sub> and determined the  
299 slopes of the regression curves as an established parameter for quantification of the coupling of

300  $Q_{on}$  to  $I_{tail}$  (Tuluc et al., 2009, Yang et al., 2010). Accordingly, the slopes for K1647A, Y1649A,  
301 and I1654A mutant Cav1.2 were strongly reduced compared to WT (Fig. 7c; Table 7). Because  
302 large gating events were rare for these mutants, we combined all data from those three mutants  
303 for further analysis to better cover that range of the curve. This analysis confirmed that the slope  
304 of the resulting curve was substantially smaller than for WT Cav1.2 (Fig. 7e). Collectively, these  
305 data indicate that binding of  $\alpha$ -actinin to the Cav1.2 IQ motif augments not only surface  
306 expression but also gating charge movement and its coupling to channel opening. Neither gating  
307 charge movements nor their coupling to channel opening were significantly affected by the  
308 F1658A or K1662E mutations (Fig. 7; Suppl. Fig. 9a, Table 7), once more arguing against a role  
309 in apoCaM binding to the IQ motif in defining NPo under basal conditions.

310

## 311 **DISCUSSION**

312 The NMR structures of  $\alpha$ -actinin-1 and apoCaM bound to the Cav1.2 IQ motif presented here  
313 revealed distinct intermolecular interactions that were verified by mutagenesis experiments  
314 involving charge inversion for both interactions. The EF hands in  $\alpha$ -actinin-1 are not capable of  
315 binding to  $Ca^{2+}$  under physiological conditions because their EF-hand loops lack the proper  
316 residues for ligating  $Ca^{2+}$  with high affinity (Backman, 2015). Therefore, the  $\alpha$ -actinin-1 EF-  
317 hand domain bound to Cav1.2 is in the  $Ca^{2+}$ -free state under basal conditions ( $[Ca^{2+}]_i$  of  $\sim 100$   
318 nM) and adopts a semi-open conformation of  $Ca^{2+}$ -free EF-hands like that observed for apoCaM  
319 bound to various target proteins (Chagot and Chazin, 2011, Feldkamp et al., 2011, Houdusse et  
320 al., 2006). However, the semi-open EF-hand conformation of  $\alpha$ -actinin-1 binds to the IQ peptide  
321 with a polarity opposite to that of apoCaM (see black arrows in Suppl. Fig. 10a,b). The Cav1.2  
322 residue K1647 at the N-terminal end of the IQ helix forms intermolecular salt bridges with  $\alpha$ -

323 actinin-1 residues E847 and E851. By stark contrast, the IQ helix is rotated 180 degrees upon  
324 binding to apoCaM (see black arrows in Suppl. Fig. 10). This opposite orientation places Cav1.2  
325 residue K1662 at the C-terminal end of the IQ helix in close proximity to CaM residues E85 and  
326 E88, which are homologous to  $\alpha$ -actinin-1 residues E847 and E851. Similarly, the IQ helices in  
327 voltage-gated Na<sup>+</sup> channels bind to apoCaM and Ca<sup>2+</sup>-saturated CaM with opposite polarity  
328 (Hovey et al., 2017). Thus, the orientation of the IQ helix bound to the EF-hand motif may be an  
329 important structural determinant of binding specificity and may explain why  $\alpha$ -actinin-1 and  
330 apoCaM have different functional effects.

331  
332 Voltage-gated Na<sup>+</sup> channels exhibit Ca<sup>2+</sup>-dependent inactivation (CDI) mediated by Ca<sup>2+</sup>-CaM  
333 (Ben-Johny et al., 2014, Gabelli et al., 2016), similar to Cav1.2 (Peterson et al., 1999, Zuhlke et  
334 al., 1999). However, the structure of apoCaM bound to the Cav1.2 IQ motif (Suppl. Fig. 10b) is  
335 quite different from previous structures of apoCaM bound to Nav1.2 (Suppl. Fig. 10c) or Nav1.5  
336 (Chagot and Chazin, 2011, Gabelli et al., 2014). The Nav1.2 IQ motif sequence is only 17%  
337 identical to that of Cav1.2 (Suppl. Fig. 10d). Nav1.2 residues A1909, A1915, and Y1919, which  
338 are not conserved in Cav1.2, each make critical contacts with apoCaM. (Suppl. Fig. 10c). The  
339 side chain methyl groups of A1909 and A1915 are each 2.5 Å away from the side chain methyl  
340 atoms of CaM residues M109 and L85, respectively. The aromatic side chain of Y1919 is in  
341 intimate contact with the aromatic side chain of F141 from CaM. Another important difference is  
342 that the Cav1.2 IQ helix binds to apoCaM with opposite directionality compared to the Nav1.2  
343 IQ helix (see black arrows in Suppl. Fig. 10b,c). Hence, the salt bridge that connects Cav1.2  
344 (K1662) to apoCaM (E88) is not conserved in Nav1.2 or Nav1.5 but the large number of non-  
345 conserved intermolecular hydrophobic contacts to Nav1.2 (Suppl. Fig. 10c) caused by the

346 opposite binding orientation of the IQ helix should outweigh any stabilization from the salt  
347 bridge in Cav1.2 and may explain why apoCaM binds to Nav1.2 and Nav1.5 with nanomolar  
348 affinity (Hovey et al., 2017) compared to the much weaker micromolar affinity of apoCaM  
349 binding to Cav1.2 (Table 4).

350

351 The relatively high dissociation constant for apoCaM binding to the  $\alpha_1$ 1.2 IQ motif ( $K_d = 10$   
352  $\mu\text{M}$ ) may be outside the physiological concentration range for apoCaM in neurons. Under basal  
353 conditions, the cytosolic apoCaM is kept below  $1\mu\text{M}$  (Wu and Bers, 2007) by proteins that have  
354 a high affinity for apoCaM. For instance, in neurons neurogranin (RC3) (Huang et al., 2004,  
355 Huang et al., 2000, Ran et al., 2003, Zhong et al., 2011) and GAP-43 (P-57) (Cimler et al., 1985)  
356 serve as sinks and reservoirs for apoCaM. In neurons, total concentration of CaM is  $\sim 10\mu\text{M}$   
357 (Egrie et al., 1977, Zhabotinsky et al., 2006), of neurogranin is  $20\mu\text{M}$  (Huang et al., 2004,  
358 Zhabotinsky et al., 2006), and of GAP-43 is  $18\mu\text{M}$  (Cimler et al., 1985, Zhabotinsky et al.,  
359 2006), and their  $K_d$  values for apoCaM are in the range of  $1\text{-}5\mu\text{M}$  (Alexander et al., 1987,  
360 Huang et al., 2000, Zhabotinsky et al., 2006), resulting in  $0.9\mu\text{M}$  free CaM under basal  
361 conditions (Zhabotinsky et al., 2006). Therefore, on the basis of the relatively low binding  
362 affinity of apoCaM ( $K_d = 10\mu\text{M}$ ), the fractional binding of apoCaM to  $\alpha_1$ 1.2 can be estimated to  
363 be less than 10% ( $Y = \frac{[CaM]}{[CaM] + K_D} < 0.1$ ) under basal physiological conditions in neurons. Recent  
364 work suggests that ectopically expressed WT CaM as well as  $\text{Ca}^{2+}$  binding-deficient CaM<sub>1234</sub> is  
365 in large excess over endogenous CaM (Iacobucci and Popescu, 2017). As a result, CaM<sub>1234</sub> may  
366 occupy a much larger fraction of  $\alpha_1$ 1.2 than the endogenous WT apoCaM. In this scenario



367 expression of CaM<sub>1234</sub> could impair CDI as seen earlier (Peterson et al., 1999) by mechanisms  
368 other than displacement of endogenous apoCaM as invoked earlier (Peterson et al., 1999).  
369  
370 Alterations of I1609 in  $\alpha_1$ 1.3 (equivalent to I1654 in  $\alpha_1$ 1.2) impair binding of apoCaM to the  
371 closely related Cav1.3 channel and Po, which was interpreted to mean that apoCaM binding to  
372 this IQ motif augments Po (Adams et al., 2014). Here we show that the homologous I1654 in the  
373 highly conserved IQ motif of Cav1.2 is not only critical for apoCaM but also  $\alpha$ -actinin binding.  
374 Accordingly, mutating I1609 could have decreased NPo by impairing  $\alpha$ -actinin rather than  
375 apoCaM binding. Indeed, cell attached channel recordings showed an ~90% reduction in Po for  
376 all three  $\alpha$ -actinin binding - deficient  $\alpha_1$ 1.2 IQ mutants. This effect included K1647, which  
377 contacts  $\alpha$ -actinin (Fig. 1c) but not apoCaM. Consistently, the K1647A mutation reduced  
378 binding of  $\alpha$ -actinin (Table 2) but not apoCaM (Table 4). The same is true for the Y1649A  
379 mutation. Although Y1649 does not form a direct interaction with  $\alpha$ -actinin EF3-EF4, the  
380 Y1649A mutation does abrogate  $\alpha$ -actinin binding in the yeast two hybrid system (Tseng et al.,  
381 2017). We suggest that Y1649 is necessary to stabilize the orientation of L1653 and neighboring  
382 I1654, which is required for binding to  $\alpha$ -actinin (Suppl. Fig. 11a). Thus, our new data indicate  
383 that Po is largely determined by  $\alpha$ -actinin and not apoCaM binding. In fact, the F1658A and  
384 K1662E mutations, which decreased apoCaM binding (Table 4), did affect neither Po (Fig. 3e)  
385 nor Q<sub>on</sub> (Fig. 7a,b,d) and minimally if at all  $\alpha$ -actinin binding (Table 2). In support of these  
386 results, others found no effect of CaM on Cav1.2 plasma membrane targeting in HEK293 cells  
387 (Bourdin et al., 2010). This conclusion is further supported by the charge inversion experiments  
388 of K1647E mutant  $\alpha_1$ 1.2 and E847K/E851K mutant  $\alpha$ -actinin-1 in which impaired functional  
389 channel availability and likely impaired Po is partially rescued (Fig. 5). These findings support

390 the functional relevance of the interaction of the positively charge K1647 in the IQ motif with  
391 the negatively charged E847 and E851 of  $\alpha$ -actinin-1. That the rescue of the reduction in Po of  
392 K1647E mutant  $\alpha_1$ 1.2 by E847K/E851K mutant  $\alpha$ -actinin-1 is far from complete can in part be  
393 explained by analysis of the E851K rotamers (Suppl. Fig. 11b-d). Most of the E851K rotamers  
394 are predicted to clash with side chain and backbone atoms within the  $\alpha$ -actinin region at the  
395 channel -  $\alpha$ -actinin interface based on our structure (Fig. 1c), which will most likely affect the  
396 positioning of the EF hand region of  $\alpha$ -actinin relative to  $\alpha_1$ 1.2 and thereby the  $\alpha$ -actinin -  $\alpha_1$ 1.2  
397 interaction. As a result, binding of E847K/E851K mutant  $\alpha$ -actinin-1 to  $\alpha_1$ 1.2 will be decreased  
398 as compared to WT  $\alpha$ -actinin. In fact, binding affinity is also not fully rescued when the K1647E  
399 IQ peptide is titrated with E847K/E851K mutant  $\alpha$ -actinin-1 EF3/4 segment (Table 2). A change  
400 in the exact structure of the region surrounding the IQ motif in full length  $\alpha_1$ 1.2 could be the  
401 reason for further impairment of  $\alpha$ -actinin binding furnishing a potential explanation for our  
402 finding that functional availability and Po is less effectively rescued by the full charge inversion  
403 than the in vitro binding affinity.

404  
405 Further mechanistic insight is provided by the strong reduction in gating charge movement upon  
406 loss of  $\alpha$ -actinin binding (Fig. 7). The most striking and very clear finding for  $Q_{on}$  is the  
407 observation that gating charges for the three  $\alpha$ -actinin binding-deficient  $\alpha_1$ 1.2 mutants are so  
408 small that they are often barely if at all detectable and amplitudes are difficult to determine.  
409 Accordingly,  $\alpha$ -actinin binding to the IQ motif promotes the outward movement of the S4  
410 segments, which gives rise to the gating charges, presumably by either lowering energy barriers  
411 for this motion or by stabilizing the 'outward' conformation of S4 segments. In addition,  $\alpha$ -  
412 actinin binding to the IQ motif augments also the coupling between this gating movement and

413 channel opening. This finding is reminiscent of the effect of Cav1.2 phosphorylation by PKA on  
414 S1700, which upregulates this coupling (Fuller et al., 2010, Fuller et al., 2014). Because of the  
415 close proximity of S1700 to the IQ motif it is tempting to speculate that phosphorylation of  
416 S1700 and  $\alpha$ -actinin binding to the IQ motif intersect to facilitate channel gating, possibly  
417 through similar effects on overall conformations of Cav1.2.

418  
419 All three  $\alpha$ -actinin binding - deficient IQ mutants of Cav1.2 reduced NPo by  $\sim 90\%$  when  
420 channel density was reduced by only 35-40% as seen by surface labeling (Tseng et al., 2017). To  
421 further ascertain that a large portion of the reduction in NPo is due to a reduction in Po and not  
422 just N, i.e., not only due to a reduction in surface expression, we determined the 95% confidence  
423 intervals (CI) for surface biotinylation, surface labeling with antibodies with subsequent analysis  
424 by fluorescence activated cell sorting (Bourdin et al., 2010, Yang et al., 2010), Po, and  $Q_{on}$   
425 (Suppl. Tables 1-3). The CIs for surface biotinylation and surface antibody labeling are  
426 remarkably similar (e.g., 52-69% and 51-71%, respectively, for the most relevant mutant  
427 K1647A, with WT being 100%) and overlap not at all with  $Q_{on}$  and Po (26-44% and 6-10%,  
428 respectively, for K1647A, with WT again being 100%). Thus, the CIs for the 95% CIs for  
429 reductions are  $\sim 29$ -49% for surface stainings, 56-74% for  $Q_{on}$ , and 90-94% for Po. Accordingly,  
430 it appears extremely unlikely that the reductions in surface expression can fully account for the  
431 reductions in  $Q_{on}$  and Po for  $\alpha$ -actinin – binding-deficient Cav1.2; rather loss of surface  
432 localization is only responsible for a fraction of the reductions in  $Q_{on}$  and Po. Similarly, the  
433 reduction in  $Q_{on}$  can most likely only partially account for the reduction in Po, supporting the  
434 notion that coupling between the movement of the voltage sensor and the channel gate is  
435 impaired in addition to the movement of this sensor.

436

437 If loss of  $\alpha$ -actinin binding to the IQ motif would not affect Po of individual channels, then NPo  
438 of all  $\alpha$ -actinin binding - deficient IQ mutants should be ~60% of wild type Cav1.2. A 90%  
439 decrease in NPo means that 60% of the Cav1.2 channels that remain on the cell surface upon  
440 impairment of  $\alpha$ -actinin binding carry only ~10% of the current seen for the wild type Cav1.2  
441 population. These effects translate into a 6-fold reduction in Po of individual Cav1.2 channels  
442 upon loss of  $\alpha$ -actinin binding.

443

444 Together with earlier work that showed that  $\alpha$ -actinin increases surface localization and  
445 postsynaptic accumulation of Cav1.2 (Hall et al., 2013, Tseng et al., 2017), this new work now  
446 demonstrates that  $\alpha$ -actinin serves a dual role in regulating Cav1.2 function. It not only promotes  
447 Cav1.2 surface expression but, remarkably, also exerts a strong positive effect on Po. This  
448 mechanism allows Cav1.2 to be minimally active during secretory trafficking or when it is  
449 outside its target regions but to become functionally fully engaged when anchored at proper  
450 locations such as postsynaptic sites. Thus, coupling of  $\alpha$ -actinin binding to both localization and  
451 activity of Cav1.2 are perfectly fine tuned. This mechanism is so far unique. Whether analogous  
452 mechanisms apply to other channels and especially other Ca<sup>2+</sup> channels, which may require  
453 potent mechanisms to prevent inappropriate and potentially harmful Ca<sup>2+</sup> flux from secretory  
454 compartments or at the wrong locations on the cell surface, is now an intriguing premise that will  
455 inspire future work.

456

457

458

459 **MATERIALS AND METHODS**

460 **NMR spectroscopy**

461 *Xenopus* calmodulin was expressed in *E. coli* strain BL21(DE3) grown in LB medium  
462 (unlabeled proteins) or M9 media supplemented with  $^{15}\text{NH}_4\text{Cl}$  or  $^{15}\text{NH}_4\text{Cl}/^{13}\text{C}$ -glucose for  
463 single- or double-labeled proteins, respectively. Recombinant CaM was prepared as described  
464 previously(Zhang et al., 2012).

465  
466 Human  $\alpha$ -actinin-1\_EF12 (residues 750-812) and  $\alpha$ -actinin-1\_EF34 (residues 822-893) were  
467 each subcloned into pET3b vector and expressed in *E. coli* strain BL21(DE3) grown in LB  
468 medium (unlabeled proteins) or M9 media supplemented with  $^{15}\text{NH}_4\text{Cl}$  or  $^{15}\text{NH}_4\text{Cl}/^{13}\text{C}$ -glucose  
469 for single- or double-labeled proteins, respectively.  $\alpha$ -actinin-1\_EF12 and  $\alpha$ -actinin-1\_EF34  
470 were each purified and prepared as described (Turner et al., 2016).

471  
472 Unlabeled Cav1.2 IQ peptide (residues 1644-1664) was purchased from ChinaPeptides. The  
473 peptide was dissolved in d6-DMSO to give a peptide concentration of 7.8 mM. An aliquot of  
474 peptide (1.5 equivalents) was added to a dilute solution of  $\alpha$ -actinin-1\_EF34 or apoCaM (50  $\mu\text{M}$   
475 protein dissolved in 20 mM 2-Amino-2-hydroxymethyl-propane-1,3-diol-d11 (Tris- $d_{11}$ ) with 50  
476 mM NaCl, 5mM dithiothreitol-d10 (DTT- $d_{10}$ ) and 95%  $\text{H}_2\text{O}/5\%$   $\text{D}_2\text{O}$ ) and incubated at 15 $^\circ\text{C}$  for  
477 1 hour to ensure complete binding of the peptide. The complex was then concentrated to a final  
478 concentration of 500  $\mu\text{M}$  in a final volume of 500  $\mu\text{L}$  for NMR experiments.

479

480

481

## 482 **Production and use of isotope-labeled peptides using pET-31**

483 We expressed  $^{15}\text{N}$ - or  $^{15}\text{N}/^{13}\text{C}$ -labeled IQ peptide in *E. coli* as a fusion protein with the  
484 ketosteroid isomerase (KSI) using the pET31 plasmid (Kuliopulos et al., 1994) (Novagen/EMD  
485 Biosciences). KSI fusion proteins are concentrated in inclusion bodies in *E. coli*, protecting the  
486 fused peptide from proteolysis. The fusion protein was purified by affinity chromatography  
487 under denaturing conditions via a 6x-His tag at the C-terminus. To release the peptide of interest,  
488 the purified fusion is cleaved using cyanogen bromide (CNBr). The CNBr cleaves at methionine  
489 residues that were engineered between the KSI and peptide, and between the peptide and 6x-His  
490 tag. This cleavage mixture is then rotary evaporated to dryness and resuspended in an  
491 appropriate ratio of acetonitrile/water, which solublizes primarily the peptide and not KSI.  
492 Finally, the peptide is purified by reverse-phase HPLC.

493

494 Two complementary oligonucleotides that code for Cav1.2 IQ peptide (5'p-TTT TAT GCG ACC  
495 TTT CTG ATT CAG GAA TAT TTT CGC AAA TTT AAA AAA CGC AAA ATG; 5'p-TTT  
496 GCG TTT TTT AAA TTT GCG AAA ATA TTC CTG AAT CAG AAA GGT CGC ATA AAA  
497 CAT) were annealed in 40 mM Tris-HCl, pH 8.0, 10mM MgCl<sub>2</sub>, 50 mM NaCl by heating to 95°  
498 C and then cooling slowly (>2h) to room temperature (RT). The annealed, double-stranded insert  
499 was then ligated into AlwNI-digested and dephosphorylated pET31 using T4 DNA Ligase. The  
500 5'-phosphorylation augments ligation and the extra Met codons (underlined) provide compatible  
501 sticky ends for the AlwNI-cut plasmid as well as the sites of CNBr cleavage. 2 ul of the ligation  
502 mixture were transformed into DH5alpha cells and plasmids from individual ampicillin-resistant  
503 colonies sequenced. Successful insertions were obtained, including some multiple insertion. We  
504 used one of the single-insertion plasmids for expression in M9 minimal media. *E. coli* was lysed

505 by sonication. The insoluble material was collected by ultracentrifugation and resuspended in  
506 6M guanidine, insoluble material removed by ultracentrifugation, and the supernatant loaded  
507 onto a Ni-NTA column equilibrated with 6M guanidine buffer. After elution with 300 mM  
508 imidazole, the purified fractions were pooled and then dialyzed against ultrapure water, causing  
509 the fusion protein to precipitate. Precipitate was collected by centrifugation and resuspended in  
510 80% formic acid, transferred to a round-bottom flask and injected with N<sub>2</sub> at ~3 psi. For a 2L  
511 scale expression, we used 60 ml of formic acid solution and added 2g of solid CNBr to start the  
512 cleavage reaction. After overnight reaction, the flask was roto-evaporated to dryness. The clear  
513 peptide film was resuspended in 40% acetonitrile / 60% H<sub>2</sub>O and mixed for >1h. After  
514 centrifugation to remove any insoluble material, the supernatant was lyophilized, resuspended in  
515 H<sub>2</sub>O + 0.1% trifluoroacetic acid and run over a C18 reverse phase HPLC column using a  
516 gradient of 9-28% acetonitrile. Peak fractions were collected, lyophilized, and analyzed by  
517 MALDI-MS to identify the desired peptide product. Dry fractions of peptide were resolublized in  
518 DMSO-d<sub>6</sub> to a concentration of >5mM.

519  
520 To measure residual dipolar couplings (RDCs) of  $\alpha$ -actinin-1\_EF34 or apoCaM bound to IQ  
521 peptide, the filamentous bacteriophage Pfl (Asla Biotech Ltd., Latvia) was used as an orienting  
522 medium. Pfl (12 mg/ml) was added to <sup>15</sup>N-labeled  $\alpha$ -actinin-1\_EF34 or apo CaM bound to  
523 unlabeled IQ at pH 7.0, to produce weak alignment of the complex.

524

### 525 **Haddock structure determination of $\alpha$ -actinin-1/IQ or apoCaM/IQ**

526 The molecular docking of  $\alpha$ -actinin-1 and apoCaM to the Cav1.2 IQ motif (residues 1644 –  
527 1664) was performed using the Haddock d-level 2.2 web server as described (van Zundert et al.,

528 2016). Residual dipolar couplings, chemical shift perturbation, and mutagenesis data were used  
529 as structural restraints. For active restraints or ambiguous interaction restraints (AIR), chemical  
530 shift perturbation was used, selecting residues whose chemical shift perturbation falls above the  
531 average perturbation.

532  
533 The initial docking calculation used NMR-derived structures of  $\alpha$ -actinin-1 or apoCaM as  
534 determined in this study, which were each docked with the helical structure of Cav1.2 IQ peptide  
535 (residues 1644-1664) (Van Petegem et al., 2005) as input structures for Haddock. A total of 69  
536 and 42 AIR restraints were used for  $\alpha$ -actinin-1 and apoCaM, respectively, based on chemical  
537 shift perturbation data and 16 active restraints were used for the IQ peptide from chemical shift  
538 perturbation. Unambiguous restraints were introduced to define key intermolecular interactions  
539 (IQ K1647 -  $\alpha$ -actinin-1\_EF34 E847; IQ K1647 -  $\alpha$ -actinin-1\_EF34 E851; IQ K1662 – CaM  
540 E88; IQ I1654 -  $\alpha$ -actinin-1\_EF3/4 F833 and IQ I1654 – apoCaM F90), which were each  
541 verified by mutagenesis (Tables 2 and 4).

542  
543 Initial docking calculations used AIRs based on chemical shift perturbation data and the top 200  
544 structures were selected for simulated annealing and water refinement. The lowest energy  
545 structures were then run again, adding unambiguous restraints based on mutagenesis data.  
546 Rigid-body docking, simulated annealing, and water refinement were run using the top 200  
547 structures. RDC restraints assigned to  $\alpha$ -actinin-1 and apoCaM were then added using the Sani  
548 statement, with tensor values  $D_r$  and  $D_a$  calculated using the program PALES (Zweckstetter,  
549 2008). A total of 74 RDC values were used from residues found in regions of regular secondary  
550 structure and as deemed reliable by the PALES calculation.



551

552 **Fluorescence polarization (FP) assays**

553 Fluorescein-labeled peptides (100 nM; ChinaPeptides, Shanghai, China) were titrated with  
554 increasing concentrations of either purified  $\alpha$ -actinin-1 or CaM in FP buffer (50 mM HEPES, pH  
555 7.4, 100 mM KCl, 1 mM MgCl<sub>2</sub>, 0.05 mM EGTA, 5 mM nitrilotriacetic acid) and FP determined  
556 with a Synergy 2 plate reader (BioTek, Winooski, VT) as described (Patriarchi et al., 2016,  
557 Tseng et al., 2017, Zhang et al., 2014). FP was calculated as  $P = (I_v - g \cdot I_h) / (I_v + g \cdot I_h)$ ;  $I_v$  is  
558 vertical and  $I_h$  are horizontal fluorescence intensity, respectively and  $g$  is the correction factor for  
559 fluorescein. To obtain binding curves and  $K_d$  values, data were fitted in GraphPad Prism 5 to the  
560 equation  $Y = B \cdot X / (K_d + X)$ ;  $B$  is maximal FP value that would be reached at saturation as  
561 determined by extrapolation of the fitted curve.

562

563 **Isothermal titration calorimetry**

564 ITC experiments were performed using a VP-ITC calorimeter (Micro-Cal) at 27°C and data were  
565 acquired and processed with MicroCal software as described previously (Wingard et al., 2005).  
566 Samples of apoCaM (injectant) and IQ (titrant) were prepared by exchanging each into buffer  
567 containing 50 mM HEPES, pH 7.4, 100 mM NaCl, 0.05 mM EGTA and 1 mM MgCl<sub>2</sub>. The IQ  
568 peptide in the sample cell (10  $\mu$ M, 1.5 mL) was titrated with apoCaM (100  $\mu$ M) using 35  
569 injections of 10  $\mu$ l each.

570

571 **Expression of Cav1.2 and  $\alpha$ -actinin-1 in HEK293 cells**

572 HEK293T/17 cells were maintained in DMEM-10 [Dulbecco's modified Eagle's medium (Life  
573 Technologies) supplemented with 10% fetal bovine serum (FBS, Atlanta Biologicals)] at 37 °C

574 in humidified incubators injected with 5% CO<sub>2</sub> and 95% air (Tseng et al., 2017). For expression  
575 of Cav1.2 HEK293T/17 cells were transfected with rat  $\alpha_1$ 1.2 (GenBank ID: M67515.1) cDNA  
576 subcloned into pECFP-C1 vector (Tseng et al., 2017) encoding an in frame N-terminally fused  
577 eCFP tag and an HA tag in the S5-H5 extracellular loop of domain II (Green et al., 2007), which  
578 does not affect channel properties (Altier et al., 2002). The point mutations in plasmids encoding  
579 single-residue K1647A, K1647E, F1648A, Y1649A, I1654A, F1658A, and K1662E exchanges  
580 in  $\alpha_1$ 1.2 were generated via QuikChange II using the above pECFP-C1 rat  $\alpha_1$ 1.2 plasmid DNA as  
581 template as described (Tseng et al., 2017) and the oligonucleotides described in Suppl. Table 1.  
582 For full expression of Cav1.2 cells were also co-transfected with pGWIH-based plasmids  
583 encoding the auxiliary subunits rat  $\beta_{2A}$  (Perez-Reyes et al., 1992) and rabbit  $\alpha_2\delta$ -1 (Ellis et al.,  
584 1988). To assess the contributions of  $\alpha$ -actinin-1 on Cav1.2, cells were transfected with pCMV  
585 plasmid DNAs encoding WT (Hall et al., 2013) or mutant  $\alpha$ -actinin-1. The K847E/K851EE point  
586 mutations in  $\alpha$ -actinin-1 were produced via QuikChange II mutagenesis as before (Tseng et al.,  
587 2017). The forward primer for making the K851E mutation, which was performed first, was 5'p-  
588 CCA TGG ACA AAT TGC GCA GAA AGC TGC CAC CCG ACC AGG and reverse primer  
589 5'p-CCT GGT CGG GTG GCA GCT TTC TGC GCA ATT TGT CCA TGG. Forward primer  
590 for the K847E mutation was 5'p-GAA CTA CAT TAC CAT GAA CAA ATT GCG CCG CGA  
591 GCT GCC ACC C and reverse primer 5'p-GGG TGG CAG CTC GCG GCG CAA TTT GTC  
592 CAT GGT AAT GTA GTT C. Transfection of HEK293T/17 cells was accomplished using Ca<sup>2+</sup>  
593 phosphate precipitation (Tseng et al., 2017) for single channel recording and surface labeling or  
594 Lipofectamine 2000 for analysis of Q<sub>on</sub>.

595

596 ***Cell Surface Biotinylation Assays.*** Seven hours after transfection, cells were washed once with  
597 150 mM NaCl, 10 mM NaHCO<sub>2</sub>, pH 7.4 (PBS) and cultured for another 15-17 hours in fresh  
598 medium. 22-24 h after transfection cells were either harvested, monodispersed (>95% viability)  
599 and then labeled with EZ-link-sulfo-NHS-LC-biotin (Thermo Fisher Scientific) in solution  
600 essentially as described (Tseng et al., 2017) or directly labeled while adhered to the petri dish. In  
601 the latter case, adherent cells on the dish were washed twice with ice cold PBS containing 0.5  
602 mM Mg<sup>2+</sup> and 1 mM Ca<sup>2+</sup> and incubated on ice with PBS containing 0.4 mg/mL EZ-link-sulfo-  
603 NHS-LC-biotin for 15 min. The labeling reaction was quenched by three five min washes with  
604 40 mM glycine in PBS containing 0.5 mM Mg<sup>2+</sup> and 1 mM Ca<sup>2+</sup> on ice. Cells were harvested by  
605 scraping in PBS and collected by centrifugation. Cell pellets were lysed in ice-cold RIPA buffer  
606 (50 mM Tris-HCl, pH 7.4, 150 mM NaCl, 5 mM EGTA, 10 mM EDTA, 1% NP-40, 0.05% SDS,  
607 0.4% DOC, and 10% glycerol) supplemented with a cocktail of protease inhibitors (1  $\mu$ g/mL  
608 leupeptin (Merck Millipore), 2  $\mu$ g/mL aprotinin (Merck Millipore), 1  $\mu$ g/mL pepstatin A (Merck  
609 Millipore), and 34  $\mu$ g/mL phenylmethanesulfonyl fluoride (PMSF; Sigma)). The solubilized  
610 material was cleared of insoluble debris by centrifugation at 200,000xg for 30 min at 4°C.  
611 Biotinylated constituents in 600  $\mu$ g of cell protein lysate were affinity purified by incubation  
612 with 30  $\mu$ L of NeutrAvidin conjugated Sepharose beads (Thermo Fisher Scientific) for 2 h at  
613 4°C. Bead-bound material was collected by centrifugation and washed three times with ice-cold  
614 buffer, and immobilized proteins were extracted in SDS sample buffer. Proteins were  
615 fractionated by SDS-PAGE in 7.5% acrylamide gels and transferred onto polyvinylidene  
616 difluoride (PVDF; BioRad) membranes. PVDF membranes were incubated in blocking buffer  
617 (BB) consisting of 150 mM NaCl, 10 mM Tris-Cl, pH 7.4 (TBS) with 0.10% Tween (TBST) and  
618 2% bovine serum albumin (BSA; RPI Corp.) for 1 h at RT before incubation with primary

619 antibodies in BB for 3 h at RT.  $\alpha_1$ 1.2 was detected by antibodies against the HA tag and, for  
620 confirmation, the intracellular loop II/III FP1 epitope (Buonarati et al., 2017) and the CNC2  
621 epitope near the C-terminus of  $\alpha_1$ 1.2 (Buonarati et al., 2017). Probing with antibodies against the  
622 cytosolic protein vinculin (Cell Signaling Technologies) and  $\alpha$ -tubulin (Santa Cruz  
623 Biotechnology) were used to correct for variation in protein content in lysates and as negative  
624 control for surface biotinylation. Membranes were washed for 40 min with at least five  
625 exchanges of TBST, incubated with horseradish peroxidase-conjugated secondary goat anti-  
626 mouse antibodies (HA,  $\alpha$ -tubulin; Jackson) or mouse anti-rabbit antibodies (FP1, CNC2,  
627 vinculin; Jackson) for 1 h at RT, and washed again with TBST with at least five exchanges for  
628 1.5 h. Immunosignals were detected using the horseradish peroxidase substrates Luminata  
629 Classico or Crescendo (Merck Millipore) or Femto (Thermo Fisher Scientific) by X-ray film  
630 (Denville Scientific Inc.). Multiple exposures over increasing time periods were taken to ensure  
631 that all signals were in the linear range (Davare and Hell, 2003, Hall et al., 2006). Films were  
632 scanned and assessed via image J to determine signal intensity for each band. Background  
633 signals in individual lanes were subtracted from the band signal before further analysis. To  
634 correct differences in immunosignal strengths due to potential differences during  
635 immunoblotting and film exposures between experiments, the individual immunosignals for each  
636  $\alpha_1$ 1.2 pull-down sample were divided by the sum of all immunosignals from one blot to obtain  
637 the relative signal fraction for each band (Degasperi et al., 2014). The mean of the WT control  
638 signals from all experiments was then calculated and all fractional values from all samples (WT  
639 and mutants) divided by this value (the WT mean transforms to 1 with this algorithm) (Degasperi  
640 et al., 2014). All values were then converted to percent, with the mean of WT control equaling

641 100%. The data were statistically analyzed applying either a student's T-test (two sample  
642 comparison) or ANOVA with Bonferroni's post hoc test as before (Tseng et al., 2017).

643

#### 644 **Cell-attached Patch Clamp Recording**

645 Cell-attached patch clamp recordings were performed as before (Davare et al., 2001, Patriarchi et  
646 al., 2016, Qian et al., 2017) on an Olympus IX70 inverted microscope at room temperature  
647 (22°C). Recordings were obtained with an Axopatch 200B amplifier and data were sampled at 10  
648 kHz with a low-pass filter at 2 kHz (3 dB, four pole Bessel) and digitalized with a Digidata 1440  
649 digitizer. Recording electrodes were fabricated from borosilicate capillary glass (0.86 OD) with a  
650 Flaming micropipette puller (Model P-97, Sutter Instruments) and polished (polisher from World  
651 Precision Instruments; 3.5 - 6.5 M $\Omega$  resistance). The extracellular solution contained (in mM)  
652 145 KCl, 10 NaCl, and 10 HEPES, pH 7.4 (NaOH). The high K<sup>+</sup> concentration was used for  
653 optimal control of the transmembrane potential under the patch during depolarizations to 0 mV.  
654 The pipette solution contained (in mM) 20 tetraethylammonium chloride (TEA-Cl), 110 BaCl<sub>2</sub>  
655 (as charge carrier), and 10 HEPES, pH 7.3 (TEA-OH). Cells were depolarized from a holding  
656 potential of -80 mV to 0 mV every 5 seconds. Event lists were translated from raw Ba<sup>2+</sup> currents  
657 after leak and capacity transients were digitally subtracted. Data were analyzed based on the  
658 half-height criterium (Sachs et al., 1982) with the single channel software provided by pClamp 10.  
659 The number of channels ( $k$ ) in the patch were estimated based on the observed simultaneous and  
660 staged openings) over several minutes at the depolarizing test potential (Bartels et al., 2018,  
661 Herzig et al., 2007). The  $k$ -value is then determined by the observed maximum current amplitude  
662 divided by the unitary current amplitude. Data with more than  $>3$  channels ( $k > 3$ ) in the patch  
663 were not considered for statistical analysis in order to prevent overinterpretation of channel open

664 probability. For statistical analysis single channel parameters were corrected by the channel  
665 number as previously (Bartels et al., 2009, Schroder et al., 1998). For a sufficient statistical  
666 analysis 50-100 Ba<sup>2+</sup> current traces were recorded on average for each cell for each experimental  
667 condition.

668

### 669 **Whole-cell patch-clamp recordings**

670 Whole-cell patch clamp recordings were performed as before (Bartels et al., 2018) on an  
671 Olympus IX70 inverted microscope at room temperature (22°C). Macroscopic Ba<sup>2+</sup> currents ( $I_{Ba}$ )  
672 of Cav1.2 were recorded in external solution containing (in mM) 75 CsCl, 40 TEA-Cl, 20 BaCl<sub>2</sub>,  
673 1 MgCl<sub>2</sub>, 10 HEPES and 10 Glucose with a pH adjusted to 7.2 (TEA-OH) and an osmolarity of  
674 300-310 (sucrose). The internal pipette solution contained (in mM) 110 CsCl, 30 TEA-Cl, 1  
675 MgCl<sub>2</sub>, 4 Mg-ATP, and 10 HEPES, pH 7.2 (CsOH), mOsm 290-300 (sucrose). Pipette resistance  
676 was usually between 1.7 -2.5 M $\Omega$ . The series resistance and the cell capacitance were taken from  
677 an Axopatch 200B Amplifier (Molecular Device) and compensated not more than <40% in order  
678 to prevent current oscillation. On-gating currents ( $Q_{on}$ ) were sampled at 50 kHz and lowpass-  
679 filtered at 5 kHz and further quantified through current integration over the first 2-3 ms of the  
680 beginning of the test pulse. Cells were clamped at a holding potential of -80 mV and depolarized  
681 by a 20 ms test pulse of a series of activating potentials starting from -60 mV to +80 mV to  
682 determine the reversal potential ( $E_{rev}$ ). Tail currents ( $I_{tail}$ ) were then measured after repolarization  
683 to -50 mV for 10 ms. Recorded data were leak and capacity corrected with an online  $P/4$   
684 protocol. The liquid junction potential was not considered for correction in the experiment. Data  
685 acquisition and analysis was obtained with pClamp 10. Curve fitting was performed by using  
686 GraphPad Prism VIII software (San Diego).

688

## 689 **Acknowledgements**

690 We thank Dr. Elza Kuzmenkina (University of Cologne, Germany) for providing the coding of  
691 the algorithm for calculating Assembly Averages.

692  
693 This work was supported by NIH grants T32 GM113770 (AMC), T32 GM099608 (PBH), R01  
694 HL098200 (MFN), R01 HL121059 (MFN), R01 EY012347 (JBA), R01MH097887 (JWH), R01  
695 AG017502 (JWH), R01 NS078792 (JWH), and the American Heart Association Predoctoral  
696 Fellowship AHA 14PRE19900021 (PBH).

697

## 698 **Author Contribution**

699 MT, DEA, MN-C, PB, MFN, MCH, JBA, and JWH designed experiments, MT, DEA, MN-C,  
700 PB, AMC, PBH, MFN, and MCH performed experiments, MT, DEA, MN-C, PB, AMC, PBH,  
701 VY-Y, DMB, MFN, MCH, JBA, and JWH analyzed data, and MT, DEA, MN-C, PB, VY-Y,  
702 DMB, MFN, MCH, JBA, and JWH wrote the manuscript.

703

## 704 **Conflict of Interest**

705 All authors declare that they do not have any conflict of interest.

706

## 707 **Data Availability**

708 The NMR assignments have been deposited in the BMRB (accession number 25902). The  
709 atomic coordinates have been deposited into the Protein Databank (6COA and 6CTB).

710

711 Supplemental Material is available in the Online version of this article.

712

## 713 **REFERENCES**

714 Adams PJ, Ben-Johny M, Dick IE, Inoue T, Yue DT (2014) Apocalmodulin itself promotes ion  
715 channel opening and Ca(2+) regulation. *Cell* 159: 608-22

716 Alexander KA, Cimler BM, Meier KE, Storm DR (1987) Regulation of calmodulin binding to P-  
717 57. A neurospecific calmodulin binding protein. *J Biol Chem* 262: 6108-13

718 Altier C, Dubel SJ, Barrere C, Jarvis SE, Stotz SC, Spaetgens RL, Scott JD, Cornet V, De Waard  
719 M, Zamponi GW, Nargeot J, Bourinet E (2002) Trafficking of L-type calcium channels mediated  
720 by the postsynaptic scaffolding protein AKAP79. *J Biol Chem* 277: 33598-603

721 Atkinson RA, Joseph C, Kelly G, Muskett FW, Frenkiel TA, Nietlispach D, Pastore A (2001)  
722 Ca<sup>2+</sup>-independent binding of an EF-hand domain to a novel motif in the alpha-actinin-titin  
723 complex. *Nat Struct Biol* 8: 853-7

724 Backman L (2015) Calcium affinity of human alpha-actinin 1. *PeerJ* 3: e944

725 Bartels P, Behnke K, Michels G, Groner F, Schneider T, Henry M, Barrett PQ, Kang HW, Lee  
726 JH, Wiesen MH, Matthes J, Herzig S (2009) Structural and biophysical determinants of single  
727 Ca(V)<sub>3.1</sub> and Ca(V)<sub>3.2</sub> T-type calcium channel inhibition by N(2)O. *Cell Calcium* 46: 293-302

728 Bartels P, Yu D, Huang H, Hu Z, Herzig S, Soong TW (2018) Alternative Splicing at N  
729 Terminus and Domain I Modulates CaV1.2 Inactivation and Surface Expression. *Biophys J* 114:  
730 2095-2106

- 731 Ben Johny M, Yang PS, Bazzazi H, Yue DT (2013) Dynamic switching of calmodulin  
732 interactions underlies Ca<sup>2+</sup> regulation of CaV1.3 channels. *Nature Commun* 4: 1717
- 733 Ben-Johny M, Yang PS, Niu J, Yang W, Joshi-Mukherjee R, Yue DT (2014) Conservation of  
734 Ca(2+)/Calmodulin Regulation across Na and Ca(2+) Channels. *Cell* 157: 1657-70
- 735 Berkefeld H, Sailer CA, Bildl W, Rohde V, Thumfart JO, Eble S, Klugbauer N, Reisinger E,  
736 Bischofberger J, Oliver D, Knaus HG, Schulte U, Fakler B (2006) BKCa-Cav channel  
737 complexes mediate rapid and localized Ca<sup>2+</sup>-activated K<sup>+</sup> signaling. *Science* 314: 615-20
- 738 Berman DE, Dudai Y (2001) Memory extinction, learning anew, and learning the new:  
739 dissociations in the molecular machinery of learning in cortex. *Science* 291: 2417-9
- 740 Bourdin B, Marger F, Wall-Lacelle S, Schneider T, Klein H, Sauve R, Parent L (2010)  
741 Molecular determinants of the CaVbeta-induced plasma membrane targeting of the CaV1.2  
742 channel. *J Biol Chem* 285: 22853-63
- 743 Buonarati OR, Henderson PB, Murphy GG, Horne MC, Hell JW (2017) Proteolytic processing  
744 of the L-type Ca<sup>2+</sup> channel alpha 1.2 subunit in neurons. *F1000Research* 6: 1166
- 745 Cahill L, Prins B, Weber M, McGaugh JL (1994) Beta-adrenergic activation and memory for  
746 emotional events. *Nature* 371: 702-4
- 747 Carter ME, Yizhar O, Chikahisa S, Nguyen H, Adamantidis A, Nishino S, Deisseroth K, de  
748 Lecea L (2010) Tuning arousal with optogenetic modulation of locus coeruleus neurons. *Nature*  
749 *Neurosci* 13: 1526-33
- 750 Chagot B, Chazin WJ (2011) Solution NMR structure of Apo-calmodulin in complex with the IQ  
751 motif of human cardiac sodium channel NaV1.5. *J Mol Biol* 406: 106-19
- 752 Cimler BM, Andreasen TJ, Andreasen KI, Storm DR (1985) P-57 is a neural specific  
753 calmodulin-binding protein. *J Biol Chem* 260: 10784-8
- 754 Cohen SM, Suutari B, He X, Wang Y, Sanchez S, Tirko NN, Mandelberg NJ, Mullins C, Zhou  
755 G, Wang S, Kats I, Salah A, Tsien RW, Ma H (2018) Calmodulin shuttling mediates cytonuclear  
756 signaling to trigger experience-dependent transcription and memory. *Nature Commun* 9: 2451
- 757 Dai S, Hall DD, Hell JW (2009) Supramolecular Assemblies and Localized Regulation of  
758 Voltage-gated Ion Channels. *Physiological Rev* 89: 411-452
- 759 Davare MA, Avdonin V, Hall DD, Peden EM, Burette A, Weinberg RJ, Horne MC, Hoshi T,  
760 Hell JW (2001) A beta2 adrenergic receptor signaling complex assembled with the Ca<sup>2+</sup> channel  
761 Cav1.2. *Science* 293: 98-101
- 762 Davare MA, Hell JW (2003) Increased phosphorylation of the neuronal L-type Ca(2+) channel  
763 Ca(v)1.2 during aging. *Proc Natl Acad Sci USA* 100: 16018-23
- 764 Degasperi A, Birtwistle MR, Volinsky N, Rauch J, Kolch W, Kholodenko BN (2014) Evaluating  
765 strategies to normalise biological replicates of Western blot data. *PLoS One* 9: e87293
- 766 Dolmetsch RE, Pajvani U, Fife K, Spotts JM, Greenberg ME (2001) Signaling to the nucleus by  
767 an L-type calcium channel-calmodulin complex through the MAP kinase pathway. *Science* 294:  
768 333-9
- 769 Dolphin AC (2012) Calcium channel auxiliary alpha(2)delta and beta subunits: trafficking and  
770 one step beyond. *Nature Rev Neurosci* 13: 542-55



- 771 Dolphin AC (2016) Voltage-gated calcium channels and their auxiliary subunits: physiology and  
772 pathophysiology and pharmacology. *J Physiol* 594: 5369-90
- 773 Egrie JC, Campbell JA, Flangas AL, Siegel FL (1977) Regional, cellular and subcellular  
774 distribution of calcium-activated cyclic nucleotide phosphodiesterase and calcium-dependent  
775 regulator in porcine brain. *J Neurochem* 28: 1207-13
- 776 Ellis SB, Williams ME, Ways NR, Brenner R, Sharp AH, Leung AT, Campbell KP, McKenna E,  
777 Koch WJ, Hui A, Schwartz A, Harpold MM (1988) Sequence and expression of mRNAs  
778 encoding the  $\alpha_1$  and  $\alpha_2$  subunits of the DHP-sensitive calcium channel. *Science* 241: 1661-1664
- 779 Evans TI, Hell JW, Shea MA (2011) Thermodynamic linkage between calmodulin domains  
780 binding calcium and contiguous sites in the C-terminal tail of Ca(V)1.2. *Biophys Chem* 159:  
781 172-87
- 782 Feldkamp MD, Yu L, Shea MA (2011) Structural and energetic determinants of apo calmodulin  
783 binding to the IQ motif of the Na(V)1.2 voltage-dependent sodium channel. *Structure* 19: 733-47
- 784 Findeisen F, Rumpf CH, Minor DL, Jr. (2013) Apo states of calmodulin and CaBP1 control  
785 CaV1 voltage-gated calcium channel function through direct competition for the IQ domain. *J*  
786 *Mol Biol* 425: 3217-34
- 787 Fuller MD, Emrick MA, Sadilek M, Scheuer T, Catterall WA (2010) Molecular Mechanism of  
788 Calcium Channel Regulation in the Fight-or-Flight Response. *Sci Signal* 3: ra70
- 789 Fuller MD, Fu Y, Scheuer T, Catterall WA (2014) Differential regulation of CaV1.2 channels by  
790 cAMP-dependent protein kinase bound to A-kinase anchoring proteins 15 and 79/150. *J Gen*  
791 *Physiol* 143: 315-24
- 792 Gabelli SB, Boto A, Kuhns VH, Bianchet MA, Farinelli F, Aripirala S, Yoder J, Jakoncic J,  
793 Tomaselli GF, Amzel LM (2014) Regulation of the NaV1.5 cytoplasmic domain by calmodulin.  
794 *Nature Commun* 5: 5126
- 795 Gabelli SB, Yoder JB, Tomaselli GF, Amzel LM (2016) Calmodulin and Ca(2+) control of  
796 voltage gated Na(+) channels. *Channels (Austin)* 10: 45-54
- 797 Ghosh D, Nieves-Cintrón M, Tajada S, Brust-Mascher I, Horne MC, Hell JW, Dixon RE,  
798 Santana LF, Navedo MF (2018) Dynamic L-type CaV1.2 channel trafficking facilitates CaV1.2  
799 clustering and cooperative gating. *Biochim Biophys Acta Mol Cell Res* 1865: 1341-1355
- 800 Ghosh D, Syed AU, Prada MP, Nystoriak MA, Santana LF, Nieves-Cintrón M, Navedo MF  
801 (2017) Calcium Channels in Vascular Smooth Muscle. *Adv Pharmacol* 78: 49-87
- 802 Green EM, Barrett CF, Bultynck G, Shamah SM, Dolmetsch RE (2007) The tumor suppressor  
803 eIF3e mediates calcium-dependent internalization of the L-type calcium channel CaV1.2.  
804 *Neuron* 55: 615-32
- 805 Grover LM, Teyler TJ (1990) Two components of long-term potentiation induced by different  
806 patterns of afferent activation. *Nature* 347: 477-9
- 807 Hall DD, Dai S, Tseng P-Y, Malik ZA, Nguyen M, Matt L, Schnizler K, Shephard A,  
808 Mohapatra D, Tsuruta F, Dolmetsch RE, Christel CJ, Lee A, Burette A, Weinberg RJ, Hell JW  
809 (2013) Competition Between  $\alpha$ -Actinin and Ca<sup>2+</sup>-Calmodulin Controls Surface Retention of the  
810 L-type Ca<sup>2+</sup> Channel CaV1.2. *Neuron* 78: 483-497

- 811 Hall DD, Feekes JA, Arachchige Don AS, Shi M, Hamid J, Chen L, Strack S, Zamponi GW,  
812 Horne MC, Hell JW (2006) Binding of protein phosphatase 2A to the L-type calcium channel  
813 Cav1.2 next to Ser1928, its main PKA site, is critical for Ser1928 dephosphorylation.  
814 *Biochemistry* 45: 3448-59
- 815 Hell JW (2014) CaMKII: Claiming Center Stage in Postsynaptic Function and Organization.  
816 *Neuron* 81: 249-65
- 817 Hell JW, Yokoyama CT, Wong ST, Warner C, Snutch TP, Catterall WA (1993) Differential  
818 phosphorylation of two size forms of the neuronal class C L-type calcium channel  $\alpha 1$  subunit. *J*  
819 *Biol Chem* 268: 19451-7
- 820 Herzig S, Khan IF, Grundemann D, Matthes J, Ludwig A, Michels G, Hoppe UC, Chaudhuri D,  
821 Schwartz A, Yue DT, Hullin R (2007) Mechanism of Ca(v)1.2 channel modulation by the amino  
822 terminus of cardiac beta2-subunits. *FASEB J* 21: 1527-38
- 823 Houdusse A, Gaucher JF, Kremntsova E, Mui S, Trybus KM, Cohen C (2006) Crystal structure  
824 of apo-calmodulin bound to the first two IQ motifs of myosin V reveals essential recognition  
825 features. *Proc Natl Acad Sci USA* 103: 19326-31
- 826 Hovey L, Fowler CA, Mahling R, Lin Z, Miller MS, Marx DC, Yoder JB, Kim EH, Tefft KM,  
827 Waite BC, Feldkamp MD, Yu L, Shea MA (2017) Calcium triggers reversal of calmodulin on  
828 nested anti-parallel sites in the IQ motif of the neuronal voltage-dependent sodium channel  
829 NaV1.2. *Biophys Chem* 224: 1-19
- 830 Hu H, Real E, Takamiya K, Kang MG, Ledoux J, Haganir RL, Malinow R (2007) Emotion  
831 Enhances Learning via Norepinephrine Regulation of AMPA-Receptor Trafficking. *Cell* 131:  
832 160-73
- 833 Huang KP, Huang FL, Jager T, Li J, Reymann KG, Balschun D (2004) Neurogranin/RC3  
834 enhances long-term potentiation and learning by promoting calcium-mediated signaling. *J*  
835 *Neurosci* 24: 10660-9
- 836 Huang KP, Huang FL, Li J, Schuck P, McPhie P (2000) Calcium-sensitive interaction between  
837 calmodulin and modified forms of rat brain neurogranin/RC3. *Biochemistry* 39: 7291-9
- 838 Iacobucci GJ, Popescu GK (2017) Resident Calmodulin Primes NMDA Receptors for Ca(2+)-  
839 Dependent Inactivation. *Biophys J* 113: 2236-2248
- 840 Kuliopulos A, Nelson NP, Yamada M, Walsh CT, Furie B, Furie BC, Roth DA (1994)  
841 Localization of the affinity peptide-substrate inactivator site on recombinant vitamin K-  
842 dependent carboxylase. *J Biol Chem* 269: 21364-70
- 843 Li H, Pink MD, Murphy JG, Stein A, Dell'Acqua ML, Hogan PG (2012) Balanced interactions  
844 of calcineurin with AKAP79 regulate Ca<sup>2+</sup>-calcineurin-NFAT signaling. *Nat Struct Mol Biol*  
845 19: 337-45
- 846 Lian LY, Myatt D, Kitmitto A (2007) Apo calmodulin binding to the L-type voltage-gated  
847 calcium channel Cav1.2 IQ peptide. *Biochem Biophys Res Commun* 353: 565-70
- 848 Ma H, Groth RD, Cohen SM, Emery JF, Li B, Hoedt E, Zhang G, Neubert TA, Tsien RW (2014)  
849 gammaCaMKII Shuttles Ca(2+)/CaM to the Nucleus to Trigger CREB Phosphorylation and  
850 Gene Expression. *Cell* 159: 281-94

- 851 Marrion NV, Tavalin ST (1998) Selective activation of  $\text{Ca}^{2+}$ -activated  $\text{K}^{+}$  channels by co-  
852 localized  $\text{Ca}^{2+}$  channels in hippocampal neurons. *Nature* 395: 900-905
- 853 Matt L, Kim K, Hergarden AC, Patriarchi T, Malik ZA, Park DK, Chowdhury D, Buonarati OR,  
854 Henderson PB, Gokcek Sarac C, Zhang Y, Mohapatra D, Horne MC, Ames JB, Hell JW (2018)  
855  $\alpha$ -Actinin Anchors PSD-95 at Postsynaptic Sites. *Neuron* 97: 1094-1109 e9
- 856 Minzenberg MJ, Watrous AJ, Yoon JH, Ursu S, Carter CS (2008) Modafinil shifts human locus  
857 coeruleus to low-tonic, high-phasic activity during functional MRI. *Science* 322: 1700-2
- 858 Patriarchi T, Qian H, Di Biase V, Malik ZA, Chowdhury D, Price JL, Hammes EA, Buonarati  
859 OR, Westenbroek RE, Catterall WA, Hofmann F, Xiang YK, Murphy GG, Chen C-Y, Navedo  
860 MF, Hell JW (2016) Phosphorylation of Cav1.2 on S1928 Uncouples the L-type  $\text{Ca}^{2+}$  Channel  
861 from the  $\beta_2$  Adrenergic Receptor. *EMBO J* 35: 1330-1345
- 862 Perez-Reyes E, Castellano A, Kim HS, Bertrand P, Bagstrom E, Lacerda AE, Wei XY,  
863 Birnbaumer L (1992) Cloning and expression of a cardiac/brain beta subunit of the L-type  
864 calcium channel. *J Biol Chem* 267: 1792-7
- 865 Peterson BZ, DeMaria CD, Adelman JP, Yue DT (1999) Calmodulin is the  $\text{Ca}^{2+}$  sensor for  
866  $\text{Ca}^{2+}$  -dependent inactivation of L- type calcium channels. *Neuron* 22: 549-58.
- 867 Pettersen EF, Goddard TD, Huang CC, Couch GS, Greenblatt DM, Meng EC, Ferrin TE (2004)  
868 UCSF Chimera--a visualization system for exploratory research and analysis. *J Comput Chem*  
869 25: 1605-12
- 870 Qian H, Patriarchi T, Price JL, Matt L, Lee B, Nieves-Cintrón M, Buonarati OR, Chowdhury D,  
871 Nanou E, Nystoriak MA, Catterall WA, Poomvanicha M, Hofmann F, Navedo MF, Hell JW  
872 (2017) Phosphorylation of Ser1928 mediates the enhanced activity of the L-type  $\text{Ca}^{2+}$  channel  
873 Cav1.2 by the  $\beta_2$ -adrenergic receptor in neurons. *Sci Signal* 10: eaaf9659
- 874 Ran X, Miao HH, Sheu FS, Yang D (2003) Structural and dynamic characterization of a neuron-  
875 specific protein kinase C substrate, neurogranin. *Biochemistry* 42: 5143-50
- 876 Ribeiro Ede A, Jr., Pinotsis N, Ghisleni A, Salmazo A, Konarev PV, Kostan J, Sjoblom B,  
877 Schreiner C, Polyansky AA, Gkoukoulia EA, Holt MR, Aachmann FL, Zagrovic B, Bordignon  
878 E, Pirker KF, Svergun DI, Gautel M, Djinovic-Carugo K (2014) The Structure and Regulation of  
879 Human Muscle  $\alpha$ -Actinin. *Cell* 159: 1447-60
- 880 Sachs F, Neil J, Barkakati N (1982) The automated analysis of data from single ionic channels.  
881 *Pflugers Arch* 395: 331-40
- 882 Schroder F, Handrock R, Beuckelmann DJ, Hirt S, Hullin R, Priebe L, Schwinger RH, Weil J,  
883 Herzig S (1998) Increased availability and open probability of single L-type calcium channels  
884 from failing compared with nonfailing human ventricle. *Circulation* 98: 969-76
- 885 Schwieters CD, Kuszewski JJ, Tjandra N, Clore GM (2003) The Xplor-NIH NMR molecular  
886 structure determination package. *J Magn Reson* 160: 65-73
- 887 Seisenberger C, Specht V, Welling A, Platzer J, Pfeifer A, Kuhbandner S, Striessnig J,  
888 Klugbauer N, Feil R, Hofmann F (2000) Functional embryonic cardiomyocytes after disruption  
889 of the L-type  $\alpha_1\text{C}$  (Cav1.2) calcium channel gene in the mouse. *J Biol Chem* 275: 39193-9

- 890 Sinnegger-Brauns MJ, Hetzenauer A, Huber IG, Renstrom E, Wietzorrek G, Berjukov S, Cavalli  
891 M, Walter D, Koschak A, Waldschutz R, Hering S, Bova S, Rorsman P, Pongs O, Singewald N,  
892 Striessnig JJ (2004) Isoform-specific regulation of mood behavior and pancreatic beta cell and  
893 cardiovascular function by L-type Ca<sup>2+</sup> channels. *J Clin Invest* 113: 1430-9
- 894 Splawski I, Timothy KW, Sharpe LM, Decher N, Kumar P, Bloise R, Napolitano C, Schwartz  
895 PJ, Joseph RM, Condouris K, Tager-Flusberg H, Priori SG, Sanguinetti MC, Keating MT (2004)  
896 Ca(V)<sub>1.2</sub> calcium channel dysfunction causes a multisystem disorder including arrhythmia and  
897 autism. *Cell* 119: 19-31
- 898 Tjandra N, Bax A (1997) Direct measurement of distances and angles in biomolecules by NMR  
899 in a dilute liquid crystalline medium. *Science* 278: 1111-4
- 900 Tseng PY, Henderson PB, Hergarden AC, Patriarchi T, Coleman AM, Lillya MW, Montagut-  
901 Bordas C, Lee B, Hell JW, Horne MC (2017)  $\alpha$ -Actinin Promotes Surface Localization and  
902 Current Density of the Ca<sup>2+</sup> Channel CaV<sub>1.2</sub> by Binding to the IQ Region of the  $\alpha$ 1  
903 Subunit. *Biochemistry* 56: 3669-3681
- 904 Tuluc P, Molenda N, Schlick B, Obermair GJ, Flucher BE, Jurkat-Rott K (2009) A CaV<sub>1.1</sub> Ca<sup>2+</sup>  
905 channel splice variant with high conductance and voltage-sensitivity alters EC coupling in  
906 developing skeletal muscle. *Biophys J* 96: 35-44
- 907 Turner M, Anderson DE, Rajan S, Hell JW, Ames JB (2016) Chemical shift assignments of the  
908 C-terminal EF-hand domain of  $\alpha$ -actinin-1. *Biomol NMR Assign* 10: 219-22
- 909 Van Petegem F, Chatelain FC, Minor DL, Jr. (2005) Insights into voltage-gated calcium channel  
910 regulation from the structure of the CaV<sub>1.2</sub> IQ domain-Ca<sup>2+</sup>/calmodulin complex. *Nat Struct*  
911 *Mol Biol* 12: 1108-15
- 912 van Zundert GC, Rodrigues JP, Trellet M, Schmitz C, Kastiris PL, Karaca E, Melquiond AS,  
913 van Dijk M, de Vries SJ, Bonvin AM (2016) The HADDOCK2.2 Web Server: User-Friendly  
914 Integrative Modeling of Biomolecular Complexes. *J Mol Biol* 428: 720-5
- 915 Wingard JN, Chan J, Bosanac I, Haeseleer F, Palczewski K, Ikura M, Ames JB (2005) Structural  
916 analysis of Mg<sup>2+</sup> and Ca<sup>2+</sup> binding to CaBP1, a neuron-specific regulator of calcium channels. *J*  
917 *Biol Chem* 280: 37461-70
- 918 Wu X, Bers DM (2007) Free and bound intracellular calmodulin measurements in cardiac  
919 myocytes. *Cell Calcium* 41: 353-64
- 920 Wyszynski M, Lin J, Rao A, Nigh E, Beggs AH, Craig AM, Sheng M (1997) Competitive  
921 binding of  $\alpha$ -actinin and calmodulin to the NMDA receptor. *Nature* 385: 439-442
- 922 Yang T, Xu X, Kernan T, Wu V, Colecraft HM (2010) Rem, a member of the RGK GTPases,  
923 inhibits recombinant CaV<sub>1.2</sub> channels using multiple mechanisms that require distinct  
924 conformations of the GTPase. *J Physiol* 588: 1665-81
- 925 Zamponi GW, Striessnig J, Koschak A, Dolphin AC (2015) The Physiology, Pathology, and  
926 Pharmacology of Voltage-Gated Calcium Channels and Their Future Therapeutic Potential.  
927 *Pharmacol Rev* 67: 821-70
- 928 Zhabotinsky AM, Camp RN, Epstein IR, Lisman JE (2006) Role of the neurogranin concentrated  
929 in spines in the induction of long-term potentiation. *J Neurosci* 26: 7337-47

- 930 Zhang Y, Li Z, Sacks DB, Ames JB (2012) Structural basis for Ca<sup>2+</sup>-induced activation and  
931 dimerization of estrogen receptor alpha by calmodulin. *J Biol Chem* 287: 9336-44
- 932 Zhang Y, Matt L, Patriarchi T, Malik ZA, Chowdhury D, Park DK, Renieri A, Ames JB, Hell  
933 JW (2014) Capping of the N-terminus of PSD-95 by calmodulin triggers its postsynaptic release.  
934 *EMBO J* 33: 1341-1353
- 935 Zhong L, Kaleka KS, Gerges NZ (2011) Neurogranin phosphorylation fine-tunes long-term  
936 potentiation. *Eur J Neurosci* 33: 244-50
- 937 Zuhlke RD, Pitt GS, Deisseroth K, Tsien RW, Reuter H (1999) Calmodulin supports both  
938 inactivation and facilitation of L-type calcium channels. *Nature* 399: 159-62
- 939 Zweckstetter M (2008) NMR: prediction of molecular alignment from structure using the  
940 PALES software. *Nat Protoc* 3: 679-90
- 941

942 **Table 1: NMR Structural Statistics for  $\alpha$ -actinin-1 EF34/IQ**

943

| <b>NMR Structural Restraints</b>                          |                                    |
|-----------------------------------------------------------|------------------------------------|
| Intermolecular NOEs                                       | 73                                 |
| Hydrogen Bonds                                            | 62                                 |
| RDC Q-Factor                                              | 0.095                              |
| $^1D_{HN}RDC$                                             | 34                                 |
| RDC Correlation Coefficient (R)                           | 0.99                               |
| <b>Root mean squared deviation from average structure</b> |                                    |
| $\alpha$ -actinin-1 backbone atoms                        | 0.5 Å $\pm$ 0.3 for 200 structures |
| $\alpha$ -actinin-1 backbone atoms (refined)              | 0.3 Å $\pm$ 0.2 for 50 structures  |
| <b>Haddock Scoring</b>                                    |                                    |
| Cluster Size                                              | 194                                |
| Van der Waals Energy                                      | -40.2 $\pm$ 6.2                    |
| Electrostatic Energy                                      | -395.4 $\pm$ 37.1                  |
| Restraints Violation Energy                               | 278.0 $\pm$ 6.23                   |
| <b>Ramachandran Plot</b>                                  |                                    |
| Most Favored Regions                                      | 96.7 %                             |
| Allowed Regions                                           | 2.2 %                              |
| Unfavored Regions                                         | 1.1 %                              |

944

945 **Table 2: Kd (in  $\mu$ M) for  $\alpha$ -actinin-1 EF3/EF4 binding to IQ as determined by FP.**  
946 Shown are mean $\pm$ SD (n=3 for all conditions)  
947

|           |        | $\alpha$ -actinin-1 EF3/4 |              |              |  |
|-----------|--------|---------------------------|--------------|--------------|--|
|           |        | WT                        | E847K/E851K  | F833A        |  |
| Cav1.2 IQ | WT     | 14 $\pm$ 2                | 167 $\pm$ 20 | 100 $\pm$ 10 |  |
|           | K1647E | 73 $\pm$ 10               | 27 $\pm$ 2   | /            |  |
|           | K1647A | 67 $\pm$ 10               | /            | /            |  |
|           | Y1649A | 42 $\pm$ 4                | /            | /            |  |
|           | I1654A | 200 $\pm$ 20              | /            | /            |  |
|           | F1658A | 20 $\pm$ 2                | /            | /            |  |
|           | K1662E | 20 $\pm$ 2                | 150 $\pm$ 20 | /            |  |

948

949 **Table 3: NMR Structural Statistics for apo CaM/IQ**  
950

| <b>NMR Structural Restraints</b>                          |                                              |
|-----------------------------------------------------------|----------------------------------------------|
| Hydrogen Bonds                                            | 62                                           |
| RDC Q-Factor                                              | 0.089                                        |
| $^1D_{HN}RDC$                                             | 36                                           |
| RDC Correlation Coefficient (R)                           | 0.99                                         |
| <b>Root mean squared deviation from average structure</b> |                                              |
| CaM backbone atoms                                        | $0.6 \text{ \AA} \pm 0.3$ for 200 structures |
| CaM backbone atoms (refined)                              | $0.6 \text{ \AA} \pm 0.2$ for 92 structures  |
| <b>Haddock Scoring</b>                                    |                                              |
| Cluster Size                                              | 200                                          |
| Van der Waals Energy                                      | $-56.8 \pm 0.6$                              |
| Electrostatic Energy                                      | $-463.5 \pm 20.7$                            |
| Restraints Violation Energy                               | $99.8 \pm 36.2$                              |
| <b>Ramachandran Plot</b>                                  |                                              |
| Most Favored Regions                                      | 89.8 %                                       |
| Allowed Regions                                           | 8.0 %                                        |
| Unfavored Regions                                         | 2.3 %                                        |

951  
952



953 **Table 4: Kd (in  $\mu$ M; mean $\pm$ SEM) for apoCaM binding to IQ as determined by FP.**  
954 Shown are mean $\pm$ SD (n=3 for all conditions)  
955

|           |        | apoCaM      |             |            |  |
|-----------|--------|-------------|-------------|------------|--|
|           |        | WT          | E88K        | F90A       |  |
| Cav1.2 IQ | WT     | 10 $\pm$ 3  | 50 $\pm$ 10 | 33 $\pm$ 5 |  |
|           | K1647E | 12 $\pm$ 3  | 53 $\pm$ 10 | /          |  |
|           | K1647A | 11 $\pm$ 3  | /           | /          |  |
|           | Y1649A | 16 $\pm$ 4  | /           | /          |  |
|           | I1654A | 68 $\pm$ 10 | /           | /          |  |
|           | F1658A | 33 $\pm$ 5  | /           | /          |  |
|           | K1662E | 60 $\pm$ 10 | 26 $\pm$ 5  | /          |  |

956

957 **Table 5: Biophysical properties of Cav1.2 microscopic single channel currents for WT**  
 958 **versus IQ motif mutants**  
 959

| Gating parameter    | Availability (%)                                         | $NP_{open}$ (%)                                          | $P_{open}$ (%)                                           | $I$ (mean ensemble avg.) [fA]                            | unitary current (pA) | sweeps | $n$   |
|---------------------|----------------------------------------------------------|----------------------------------------------------------|----------------------------------------------------------|----------------------------------------------------------|----------------------|--------|-------|
| WT <sup>a</sup>     | 56.2±6.3                                                 | 3.6±0.75                                                 | 3.4±0.7                                                  | 14.8±3.1                                                 | 0.89±0.02            | 2744   | 32-35 |
| K1647A <sup>b</sup> | 21.0±7.6**                                               | 0.30±0.09***                                             | 0.27±0.08***                                             | 2.3±0.6**                                                | 0.97±0.05            | 868    | 12    |
| F1648A <sup>c</sup> | 69.7±6.6                                                 | 3.2±0.7                                                  | 3.2±0.7                                                  | 14.4±2.6                                                 | 0.87±0.02            | 1221   | 13-14 |
| Y1649A <sup>d</sup> | 16.8±6.8**                                               | 0.53±0.17**                                              | 0.49±0.2***                                              | 1.9±0.5**                                                | 0.84±0.06            | 556    | 8     |
| I1654A <sup>e</sup> | 7.0±2.1**                                                | 0.44±0.2***                                              | 0.35±0.2***                                              | 1.4±0.6***                                               | 0.94±0.04            | 589    | 7     |
| F1658A <sup>f</sup> | 47.8±7.6                                                 | 5.0±2.2                                                  | 4.7±2.2                                                  | 18.8±8.6                                                 | 0.90±0.03            | 986    | 12    |
| K1662E <sup>g</sup> | 62.5±9.7                                                 | 4.2±1.1                                                  | 4.1±1.1                                                  | 15.9±4.2                                                 | 0.99±0.03            | 1015   | 13    |
| One-Way ANOVA       | a-b <sup>†</sup><br>a-d <sup>†</sup><br>a-e <sup>†</sup> | a-b <sup>†</sup><br>a-d <sup>†</sup><br>a-e <sup>†</sup> | a-b <sup>†</sup><br>a-d <sup>†</sup><br>a-e <sup>†</sup> | a-b <sup>†</sup><br>a-d <sup>†</sup><br>a-e <sup>†</sup> | NS                   |        |       |

960  
 961 HEK293 cells were transiently transfected with WT and IQ domain mutant Cav1.2 ( $\alpha_11.2$ ,  $\alpha_2\delta_1$  and  $\beta_{2a}$ ) for  
 962 recording of single channel activity in 110 mM Ba<sup>2+</sup> upon depolarized from a holding potential -80 mV to a  
 963 test potential (TP) of 0 mV for 2 seconds at an interpulse rate of 0.14 Hz. Availability is quantified as the  
 964 fraction of sweeps showing channel activity over the number of total sweeps. Statistical significance was  
 965 determined by pairwise multiple testing among groups against the WT<sup>a</sup> by a One-way ANOVA with  
 966 Bonferroni<sup>†</sup> post-hoc test or Welch ANOVA with Tamhane<sup>‡</sup> T2 test. Given are mean values  $\pm$  SEM (\*p <  
 967 0.05, \*\*p < 0.01, \*\*\*p < 0.0001).

968  
969  
970

**Table 6: Effect of  $\alpha$ -actinin-1 ectopic expression on biophysical properties of Cav1.2 single channel currents**

| Gating parameter                                       | Availability (%)                                         | NP <sub>open</sub> (%)               | P <sub>open</sub> (%)                                | I(Mean ensemble Avg.) [fA]                        | unitary current (pA) | sweeps | n     |
|--------------------------------------------------------|----------------------------------------------------------|--------------------------------------|------------------------------------------------------|---------------------------------------------------|----------------------|--------|-------|
| <b>WT<sup>a</sup></b>                                  | 56.6±6.3                                                 | 3.6±0.75                             | 3.4±0.69                                             | 14.8±3.1                                          | 0.89±0.02            | 2744   | 32-35 |
| <b>WT+ <math>\alpha</math>-Actinin<sup>b</sup></b>     | 76.5±6.2*                                                | 9.2±2.0**                            | 7.9±2.0*                                             | 31.3±7.5*                                         | 0.84±0.02            | 2388   | 23-25 |
| <b>WT+ EE847/851KK<sup>c</sup></b>                     | 32.9±7.5***                                              | 1.9±0.7**                            | 1.8±0.7*                                             | 7.4±2.8*                                          | 0.83±0.03            | 1252   | 13    |
| <b>F1647E+ <math>\alpha</math>-Actinin<sup>d</sup></b> | 43±5.0                                                   | 1.8±0.3                              | 1.7±0.3                                              | 8.5±1.5                                           | 0.83±0.01            | 2601   | 30    |
| <b>F1647E+ EE847/851KK<sup>e</sup></b>                 | 67.9±6.9**                                               | 2.6±0.5                              | 2.5±0.5                                              | 11.3 ±2.7                                         | 0.84±0.02            | 1376   | 16    |
| <b>unpaired T-test</b>                                 | a-b <sup>‡</sup><br>b-c <sup>‡</sup><br>d-e <sup>‡</sup> | a-b <sup>‡</sup><br>b-c <sup>‡</sup> | a-b <sup>‡</sup><br>b-c <sup>‡</sup><br>d-e<br>p=0.7 | a-b <sup>‡</sup><br>b-c <sup>‡</sup><br>d-e p=0.7 | NS                   |        |       |

971  
972 HEK293 cells were transiently transfected with WT Cav1.2 ( $\alpha_1$ 1.2,  $\alpha_2$ . $\delta_1$  and  $\beta_{2a}$ ) and, if indicated,  
973 with  $\alpha$ -Actinin-1 WT or E847K/E851K. Single channel activity was obtained as in Table 5.  
974 Statistical significance was determined by pairwise testing of Cav1.2 WT alone vs. Cav1.2 WT +  
975  $\alpha$ -Actinin WT, Cav1.2 WT +  $\alpha$ -Actinin-1 WT vs. Cav1.2 +  $\alpha$ -Actinin-1 E847K/E851K, and Cav1.2  
976 K1647E +  $\alpha$ -Actinin-1 WT vs. Cav1.2 K1647E +  $\alpha$ -Actinin-1 E847K/E851K with an unpaired T-  
977 test<sup>‡</sup>. Given are mean values ± SEM (\*p < 0.05, \*\*p < 0.01, \*\*\*p < 0.0001). Values for Cav1.2 WT  
978 are provided in grey tone for comparison from Table 5.  
979

980 **Table 7. Biophysical properties of Cav1.2 macroscopic whole cell patch currents for WT**  
 981 **versus IQ motif mutants**

| Analysis                  | I-V                                  |                  |                 | G-V                                  |                 |            | Charge movement                                          | $I_{Tail}/Q_{on}$ |
|---------------------------|--------------------------------------|------------------|-----------------|--------------------------------------|-----------------|------------|----------------------------------------------------------|-------------------|
|                           | $V_{1/2act.}$ (mV)                   | $k_{act.}$       | $E_{rev.}$ (mV) | $V_{1/2act.}$ (mV)                   | $k_{low}$       | $k_{high}$ | $Q_{on}$ (fC/pF)                                         | <i>slope</i>      |
| <b>WT<sup>a</sup></b>     | -18.5±0.5                            | -4.2±0.4<br>(10) | 51.3±1.3        | -6.5.0±0.4                           | 7.0±0.3<br>(16) | -8.5±27.4  | 3.8±0.9<br>(18)                                          | 3.9±1.5<br>(16)   |
| <b>K1647A<sup>b</sup></b> | -19.9±0.9                            | -5.9±0.6<br>(11) | 55.2±2.0        | -8.5.0±0.9                           | 8.5±0.8<br>(15) | 9.0±10.5   | 1.3±0.3*<br>(15)                                         | 0.26±1.5<br>(15)  |
| <b>Y1649A<sup>c</sup></b> | -19.9±0.6                            | -4.0±0.5<br>(10) | 49.2±1.5        | -6.3.0±0.7                           | 7.5±0.8<br>(16) | 28.7±6.9   | 0.98±0.3**<br>(13)                                       | 0.19±1.0<br>(12)  |
| <b>I1654A<sup>d</sup></b> | -12.6±1.0****                        | -5.4±0.7<br>(5)  | 48.2±2.6        | -2.5±0.9**                           | 7.5±0.9<br>(13) | 38.5±11.5  | 0.87±0.3**<br>(13)                                       | 1.3±0.6<br>(12)   |
| <b>F1658A<sup>e</sup></b> | -26.5±1.1**                          | -4.5±0.9<br>(6)  | 58.6±4.1        | -10.6±1.4**                          | 5.3±1.6<br>(11) | 20.2±3.9   | 2.8±0.6<br>(13)                                          | 3.1±1.4<br>(12)   |
| <b>K1662E<sup>f</sup></b> | -20.2±0.4                            | -4.2±0.3<br>(12) | 50.1±1.2        | -6.1.0±0.7                           | 7.9±0.8<br>(21) | 49.2±19.4  | 3.5±1.1<br>(17)                                          | 2.2±1.0<br>(14)   |
| <b>ANOVA/<br/>T-Test</b>  | a-d <sup>†</sup><br>a-e <sup>†</sup> | NS               | NS              | a-d <sup>†</sup><br>a-e <sup>†</sup> | NS              | NS         | a-b <sup>†</sup><br>a-c <sup>†</sup><br>a-d <sup>†</sup> |                   |

982  
 983 HEK293 cells were transiently transfected with WT Cav1.2 ( $\alpha_11.2$ ,  $\alpha_2\delta_1$  and  $\beta_{2a}$ ). Whole cell patch  
 984 recording was performed in 20 mM Ba<sup>2+</sup> (see Fig. 7). To obtain current - voltage relationships (I-V),  
 985 currents were recorded upon depolarization from a holding potential of -80 mV to increasingly more  
 986 positive potentials (see Figure 7A for details). The voltage for half maximal activation ( $V_{1/2act.}$ ), activation  
 987 constant ( $k_{act.}$ ), and reversal potential ( $E_{rev.}$ ) was determined. To obtain conductance - voltage  
 988 relationships (G-V), tail currents ( $I_{Tail}$ ) were recorded upon repolarization to -50 mV following  
 989 depolarization from a holding potential of -80 mV to increasingly more positive potentials (see Figure  
 990 7A for details). The activation kinetics for G-V were best described by double exponential fits and the  
 991 rate constants  $k_{high}$  and  $k_{low}$  were determined accordingly. Total charge movement ( $Q_{on}$ ) and the ratio  
 992 of  $I_{Tail} / Q_{on}$  were determined as in Fig. 7. Statistical significance was determined by pairwise multiple  
 993 testing among groups against the WT<sup>a</sup> by a One-way ANOVA with a Bonferroni<sup>†</sup> post-hoc test. Given  
 994 are mean values ± SEM (\*p < 0.05, \*\*p < 0.01, \*\*\*\*p < 0.0001).

995  
 996  
 997

998  
999  
1000  
1001  
1002  
1003  
1004

**Supplemental Tables 1-3**

**Supplemental Table 1. 95% Confidence intervals (CI) for surface labelling, Qon, and Po for WT and IQ mutant Cav1.2**

Given are means $\pm$ SEM and 95% CIs for experimental values. The number of experiments is shown in parenthesis. \*The biotinylation and flow cytometry data are based on data originally published by Tseng et al (2017).

| Parameter       | *Biotinylation (% of WT) | 95% CI | *Flow Cytometry (% of WT) | 95% CI | Gating Current Qon (% of WT) | 95% CI | P <sub>open</sub> (% of WT) | 95% CI |
|-----------------|--------------------------|--------|---------------------------|--------|------------------------------|--------|-----------------------------|--------|
| $\alpha$ 1.2 WT | 100 $\pm$ 0 (16)         | 0-0    | 100 $\pm$ 0 (7)           | 0-0    | 100 $\pm$ 24 (18)            | 78-122 | 100 $\pm$ 20 (35)           | 87-113 |
| K1647A          | 61 $\pm$ 5 (11)          | 52-69  | 61 $\pm$ 7 (7)            | 51-71  | 35 $\pm$ 9 (15)              | 26-44  | 8 $\pm$ 2 (12)              | 6-10   |
| F1648A          | 94 $\pm$ 7 (8)           | 85-104 | ND                        |        | ND                           |        | 93 $\pm$ 20 (14)            | 73-114 |
| Y1649A          | 66 $\pm$ 5 (12)          | 61-72  | 63 $\pm$ 7 (6)            | 52-74  | 26 $\pm$ 8 (13)              | 18-35  | 15 $\pm$ 5 (8)              | 8-22   |
| I1654A          | 68 $\pm$ 4 (10)          | 63-73  | 61 $\pm$ 8 (6)            | 49-74  | 23 $\pm$ 10 (13)             | 1-34   | 10 $\pm$ 5 (7)              | 3-17   |
| Q1655A          | 85 $\pm$ 5 (7)           | 78-92  | 104 $\pm$ 6 (4)           | 93-116 | ND                           |        | ND                          |        |
| F1658A          | ND                       |        | ND                        |        | 76 $\pm$ 16 (13)             | 59-93  | 139 $\pm$ 64 (12)           | 45-121 |
| K1662E          | ND                       |        | ND                        |        | 93 $\pm$ 29 (17)             | 52-134 | 120 $\pm$ 32 (13)           | 86-154 |

1005  
1006  
1007  
1008  
1009

1010 **Supplemental Table 2. 95% Confidence intervals (CI) for surface biotinylation for Cav1.2 /  $\alpha$ -**  
1011 **actinin-1 charge inversion experiments**

1012 Given are means $\pm$ SEM and 95% CIs (based on original data from this manuscript). The number of  
1013 experiments is shown in parenthesis.

1014  
1015  
1016  
1017  
1018  
1019  
1020  
1021  
1022  
1023  
1024  
1025  
1026  
1027  
1028  
1029  
1030  
1031  
1032  
1033  
1034  
1035  
1036  
1037  
1038  
1039  
1040  
1041  
1042  
1043  
1044

| <b>Parameter</b>                                                                     | <b>Biotinylation (%)</b> | <b>95% CI</b> |
|--------------------------------------------------------------------------------------|--------------------------|---------------|
| <b><math>\alpha</math>1.2 WT</b>                                                     | 100 $\pm$ 6<br>(7)       | 86-<br>114    |
| <b><math>\alpha</math>1.2 WT +<br/><math>\alpha</math>-Actinin WT</b>                | 153 $\pm$ 6<br>(7)       | 139-<br>167   |
| <b><math>\alpha</math>1.2WT+<br/><math>\alpha</math>-Actinin WT</b>                  | 100 $\pm$ 9<br>(5)       | 74-<br>126    |
| <b><math>\alpha</math>1.2 WT +<br/><math>\alpha</math>-Actinin<br/>EE/KK</b>         | 48 $\pm$ 9<br>(5)        | 24-<br>72     |
| <b><math>\alpha</math>1.2 K1647E<br/>+<br/><math>\alpha</math>-Actinin WT</b>        | 60 $\pm$ 5<br>(5)        | 47-<br>73     |
| <b><math>\alpha</math>1.2 K1647E<br/>+<br/><math>\alpha</math>-Actinin<br/>EE/KK</b> | 55 $\pm$ 5<br>(4)        | 39-<br>71     |

1045 **Supplemental Table 3. 95% Confidence intervals (CI) for Po for Cav1.2 /  $\alpha$ -actinin-1 charge**  
1046 **inversion experiments**

1047 Given are means $\pm$ SEM and 95% CIs (based on original data from this manuscript). The number of  
1048 experiments is shown in parenthesis.

1049  
1050  
1051  
1052  
1053  
1054  
1055  
1056  
1057  
1058  
1059  
1060  
1061  
1062  
1063  
1064  
1065  
1066  
1067  
1068  
1069  
1070  
1071  
1072

| <b>Parameter</b>                                                                    | <b>P<sub>open</sub> (%)</b> | <b>95% CI</b> |
|-------------------------------------------------------------------------------------|-----------------------------|---------------|
| <b><math>\alpha</math>1.2 WT</b>                                                    | 100 $\pm$ 20<br>(35)        | 87-<br>113    |
| <b><math>\alpha</math>1.2 WT +<br/><math>\alpha</math>-Actinin WT</b>               | 233 $\pm$ 59<br>(23)        | 186 -<br>280  |
| <b><math>\alpha</math>1.2 WT+<br/><math>\alpha</math>-Actinin<br/>EE/KK</b>         | 55 $\pm$ 22<br>(13)         | 32-<br>78     |
|                                                                                     |                             |               |
| <b><math>\alpha</math>1.2 K1647E<br/>+<br/><math>\alpha</math>-Actinin WT</b>       | 100 $\pm$ 18<br>(30)        | 87-<br>113    |
| <b><math>\alpha</math>1.2K1647E<br/>+<br/><math>\alpha</math>-Actinin<br/>EE/KK</b> | 147 $\pm$ 28<br>(16)        | 120-<br>174   |

1073 **Fig. 1 |  $\alpha$ -Actinin-1 makes electrostatic and hydrophobic contacts with Cav1.2.**

1074 a, Linear model of  $\alpha$ -actinin domains (CH, calponin homology domains; SR, spectrin repeats;  
1075 EF, EF hands). Bars and numbers on top of the model depict the segments used in this work.

1076 b, Ensemble of 10 lowest energy NMR-derived structures of  $\alpha$ -actinin-1\_EF34 (cyan) bound to  
1077 IQ peptide (red). Structural statistics are given in Table 1.

1078 c, Energy minimized average structure of  $\alpha$ -actinin-1\_EF34 (cyan) bound to IQ (red), revealing  
1079 intermolecular salt bridges between K1647 of IQ and E847/E851 of  $\alpha$ -actinin-1. The K1647 side  
1080 chain amino nitrogen atom is 2.8 Å and 2.5 Å away from the side chain carbonyl oxygen atoms  
1081 of E847 and E851, respectively.

1082 d, Intermolecular hydrophobic contacts between I1654 of IQ (red) and F833 of  $\alpha$ -actinin-1  
1083 (cyan). The I1654 side chain methyl carbon atom is 2.9 Å away from the closest aromatic ring  
1084 atom of F833. Side-chain atoms are colored yellow.

1085 e, Lack of direct contacts between F1658 of IQ (red) and  $\alpha$ -actinin-1 (cyan). The aromatic side  
1086 chain of F1658 is primarily solvent exposed and does not directly contact  $\alpha$ -actinin-1. The  
1087 aromatic ring of F1658 is closest to the aromatic ring of Y859 and  $\beta$ -methylene carbon of Q856  
1088 of  $\alpha$ -actinin-1, which are 5.2 Å and 4.3 Å apart, respectively.

1089 f, FP titrations show binding of WT  $\alpha$ -actinin-1\_EF34 to IQ peptides WT (black) and K1647E  
1090 (red), of  $\alpha$ -actinin-1\_EF34 mutant E847K/E851K to IQ peptides WT (green) and K1647E  
1091 (purple), of full-length  $\alpha$ -actinin-1 to IQ WT (o), and lack of IQ binding to  $\alpha$ -actinin-1\_CH1-CH2  
1092 (+) and  $\alpha$ -actinin-1\_EF12 (x; see Table 2 for binding parameters and standard errors).

1093 g, FP titrations showing binding of wild type  $\alpha$ -actinin-1\_EF34 to IQ peptides WT (black) and  
1094 I1654A (purple) and of ACTN1\_EF34 mutant F833 to IQ WT (red; see Table 2 for binding  
1095 parameters and standard errors).

1096

1097



1098 **Fig. 2 | ApoCaM makes electrostatic and hydrophobic contacts with Cav1.2.**

1099 a, Ensemble of 10 lowest energy NMR-derived structures of apo CaM/IQ complex. Structural  
1100 statistics are given in Table 3.

1101 b, Energy minimized average structure of apoCaM (cyan) bound to IQ (red), showing an  
1102 intermolecular salt bridge between IQ K1662 and apoCaM E88. The K1662 side chain amino  
1103 nitrogen atom is 2.7 Å away from the side chain carbonyl oxygen of E88.

1104 c, Intermolecular hydrophobic contacts between IQ I1654 (red) and apoCaM F90 (cyan). Side  
1105 chain atoms colored yellow. The I1654 side chain methyl carbon atom is 2.2 Å away from the  
1106 closest aromatic ring atom of F90.

1107 d, Intermolecular hydrophobic contacts between F1658 of IQ and F90/M110 in apoCaM. The  
1108 aromatic side chain atoms of F1658 are 2.3Å and 2.6 Å away from the closest side chain atom of  
1109 F90 and M110, respectively.

1110 e, FP titrations showing binding of apoCaM to IQ peptides WT (black) and K1662E (red) and of  
1111 apoCaM mutant E88K to IQ WT (green) and IQ peptide K1662E (purple, “charge inversion”; see  
1112 Table 4 for binding parameters and standard errors).

1113 f, FP titrations showing binding of apo-CaM to IQ peptides WT (black), I1654A (red), and F1658A  
1114 (green) and of apoCaM mutant F90A to IQ WT (blue; see Table 4 for binding parameters and  
1115 standard errors).

1116

1117

1118 **Fig. 3 | Cav1.2 mutations that affect  $\alpha$ -Actinin-1 drastically decrease channel open**  
1119 **probability.**

1120 HEK293 cells were transfected with  $\alpha_1$ 1.2,  $\alpha_2\delta$ -1, and  $\beta_{2A}$  and cultured for 22-24h before cell  
1121 attached patch recording in 110 mM Ba<sup>2+</sup>.

1122 a, Single Cav1.2 channel recordings of Cav1.2 WT and K1647A. Holding potential (HP) was  
1123 -80 mV and test potential (TP) 0 mV. Shown are 20 consecutive sweeps from representative  
1124 experiments.

1125 b, Mean assembly averages for all experiments with Cav1.2 WT and K1647A, which are based on  
1126 a total of 2744 and 868 sweeps, respectively (see Table 5).

1127 c-e, Means  $\pm$  SEM for availability (i.e., likelihood that a sweep had at least one event; c), Po (d),  
1128 and the mean of the current of a single channel at any point in time calculated from the ensemble  
1129 averages of each experiment (e) (\*\*p<0.01, \*\*\*p<0.001 compared to WT; one-way ANOVA with  
1130 Bonferroni post-hoc test (c) or Welch ANOVA with Tamhane T2 test (d,e); n = 7 to 35 (given in  
1131 parenthesis in each column); see Suppl. Fig. 5, 6 and Table 5 for more details).

1132

1133

1134 **Fig. 4 | Ectopic  $\alpha$ -actinin-1 expression increases Cav1.2 open probability.**  
1135 HEK293 cells were transfected with  $\alpha_11.2$ ,  $\alpha_2\delta$ -1, and  $\beta_{2A}$  plus, if indicated,  $\alpha$ -actinin-1 before  
1136 cell attached patch recording.  
1137 a, Representative single Cav1.2 channel recordings of WT Cav1.2 alone or with WT or  
1138 E847K/E851K mutant  $\alpha$ -actinin-1.  
1139 b, Mean assembly averages for all experiments for each combination.  
1140 c-e, Means  $\pm$  SEM for availability (c), Po (d), and the mean of the current of a single channel  
1141 calculated from the ensemble averages of each experiment (e) (\* $p < 0.05$ , \*\* $p < 0.01$ , \*\*\* $p < 0.001$ ;  
1142 unpaired t-test;  $n = 13$  to  $35$ ; see Suppl. Fig. 7 and Table 6 for more details).  
1143  
1144

1145 **Fig. 5 |  $\alpha$ -Actinin-1 E847K/E851K rescues open probability for Cav1.2 K1647E.**

1146 HEK293 cells were transfected with  $\alpha_1$ 1.2 with the K1647E mutation,  $\alpha_2\delta$ -1, and  $\beta_{2A}$  plus  $\alpha$ -  
1147 actinin-1 WT or E847K/E851K before cell attached patch recording.

1148 a, Representative single Cav1.2 channel recordings of Cav1.2 K1647E with WT or E847K/E851K  
1149  $\alpha$ -actinin-1.

1150 b, Mean assembly averages for all experiments for both combinations.

1151 c-e, Means  $\pm$  SEM for availability (c), Po (d), and mean of the current of a single channel

1152 calculated from the ensemble averages of each experiment (e) (\*\*p<0.01; unpaired t-test; n = 16  
1153 to 35=0; see Suppl. Fig. 8 and Table 6 for more details).

1154

1155

1156 **Fig. 6 | Modulation of Cav1.2 surface expression via its interaction with  $\alpha$ -actinin-1.**

1157 a, HEK293 cells were transfected with WT  $\alpha_1$ 1.2,  $\alpha_2\delta$ -1, and  $\beta_{2A} \pm$  WT  $\alpha$ -actinin-1 and cultured  
1158 for 22-24h before surface biotinylation. Shown are representative immunoblots of NeutrAvidin  
1159 pull-down samples (from lysate containing 600  $\mu$ g protein) and total lysate samples containing  
1160 20  $\mu$ g protein.  $\alpha_1$ 1.2 was detected with an antibody against its HA tag (*top*), which is present in  
1161 all constructs used throughout this work. Pull-down and lysate samples are from the same blot  
1162 but different exposures because signals from lysate samples were much stronger than from pull-  
1163 down samples. Immunoblotting for vinculin (*middle*) and tubulin (*bottom*) indicated that  
1164 comparable amounts of these intracellular control proteins were present in lysate samples. Their  
1165 absence in pull-down samples as seen on the same blots showed that these prominent  
1166 intracellular proteins did not undergo biotinylation as control for membrane integrity during  
1167 surface biotinylation. Bar graph shows means  $\pm$  SEM of the pull-down immunosignals in  
1168 mutants relative to surface labelling of control  $\alpha_1$ 1.2 samples lacking  $\alpha$ -actinin-1 co-expression  
1169 (mean set to 100%; see Methods; \* $p < 0.05$ ; two-tailed t-test;  $n = 7$ ).

1170 b, HEK293 cells were transfected with WT or K1647E mutant  $\alpha_1$ 1.2,  $\alpha_2\delta$ -1, and  $\beta_{2A}$ , and WT or  
1171 E847K/E851K mutant  $\alpha$ -actinin-1, or CFP alone as negative control and cultured for 22-24h  
1172 before surface biotinylation. Shown are representative immunoblots of pull-down and lysate  
1173 samples as in (a). Bar graph shows means  $\pm$  SEM of the pull-down immunosignals in mutants  
1174 relative to surface labelling in the WT/WT control (mean set to 100%; see Methods). \*\* $p < 0.01$ ,  
1175 \*\*\* $p < 0.001$ ; one-way ANOVA with Tukey post hoc test;  $n = 4-5$ ).

1176

1177

1178 **Fig. 7 | Cav1.2 mutations that affect  $\alpha$ -actinin-1 impair gating charge movement and its**  
1179 **coupling to channel opening.**

1180 HEK293 cells were transfected with  $\alpha_1$ 1.2,  $\alpha_2\delta$ -1, and  $\beta_{2A}$  before whole cell patch recording in  
1181 20 mM Ba<sup>2+</sup>.

1182 a, Representative current traces of the first 2 ms obtained from recordings upon depolarizations  
1183 from a holding potential of -80 mV to the indicated potentials (the voltage protocol is  
1184 schematized in the upper left corner).

1185 b, Representative current traces upon step depolarizations to the reversal potential ( $E_{rev}$ ) for 20  
1186 ms to obtain movement of the ON-gating charges ( $Q_{on}$ ), and subsequent to -50 mV for 10 ms to  
1187 obtain tail currents ( $I_{tail}$ ). Insets: magnifications of exemplary  $Q_{on}$  for Cav1.2 WT, K1647A,  
1188 Y1649A, I1654A, F1658A and K1662E.

1189 c, Plots of  $I_{tail}$  (in this panel corrected for variations in cell capacitance) versus total detectable  
1190 charge transfer for  $Q_{on}$ . Slopes of regression curves are strongly reduced for Cav1.2 K1647A,  
1191 Y1649A and I1654A versus WT (see Table 7 for more details).

1192 d, Means  $\pm$  SEM of  $Q_{on}$  (in this panel corrected for variations in cell capacitance; \* $p$ <0.05;  
1193 \*\* $p$ <0.01; one-way ANOVA with Bonferroni post-hoc test;  $n$  = 13-18; see Suppl. Fig. 9 and  
1194 Table 7 for more details).

1195 e, The reduction in slope of the regression curve of combined population data for K1647A,  
1196 Y1649A and I1654A versus WT indicates reduced coupling of  $I_{tail}$  with  $Q_{on}$  when  $\alpha$ -actinin  
1197 binding to the IQ motif is diminished.

1198

1199  
1200  
1201  
1202  
1203  
1204  
1205  
1206  
1207  
1208  
1209

SUPPLEMENTAL MATERIAL

**$\alpha$ -Actinin-1 promotes activity of the L-type Ca<sup>2+</sup> Channel Cav1.2**

Matthew Turner<sup>1§</sup>, David E. Anderson<sup>1§</sup>, Madeline Nieves-Cintrón<sup>2§</sup>, Peter Bartels<sup>2§</sup>, Andrea M. Coleman<sup>1,2</sup>, Peter B. Henderson<sup>2</sup>, Kwun Nok Mimi Man<sup>2</sup>, Vladimir Yarov-Yarovoy<sup>3</sup>, Donald M. Bers<sup>2</sup>, Manuel F. Navedo<sup>2</sup>, Mary C. Horne<sup>2#</sup>, James B. Ames<sup>1#</sup>, and Johannes W. Hell<sup>2#</sup>

<sup>1</sup>Department of Chemistry, <sup>2</sup>Department of Pharmacology, and <sup>3</sup>Department of Physiology and Membrane Biology, University of California, Davis, CA 95616, USA.

1210 **Supplemental Figure 1. Amino acid sequence alignment of the membrane proximal portion**  
1211 **of the C-terminal tail of L-type Ca<sup>2+</sup> channels.**

1212 Bold refers to reference sequence (rat  $\alpha_1$ 1.2), turquoise to divergency in amino acid sequence,  
1213 red to residues K1647 and Y1649, which are important for  $\alpha$ -actinin binding only, green to  
1214 I1654, which is important for both,  $\alpha$ -actinin and apoCaM binding, and yellow to F1658 and  
1215 K1662, which are important for apoCaM binding only. Amino acid sequences were derived from  
1216 species according to the numerical labeling<sup>1-13</sup>. Data were extracted and compiled from  
1217 [uswest.ensembl.org](http://uswest.ensembl.org).

1218

1219



1220 **Supplemental Figure 2. Mapping the Cav1.2 IQ binding site in  $\alpha$ -actinin and apoCaM.**

1221 a, Overlay of  $^{15}\text{N}$ - $^1\text{H}$  HSQC spectra of  $^{15}\text{N}$ -labeled  $\alpha$ -actinin-1 CH1/CH2 domain (residues 19-  
1222 192) by itself (black peaks) and after addition of saturating, unlabeled IQ peptide (red peaks).

1223 b, Overlay of  $^{15}\text{N}$ - $^1\text{H}$  HSQC spectra of  $^{15}\text{N}$ -labeled  $\alpha$ -actinin-1 EF-hand domain (residues 750-  
1224 892) by itself (black peaks) and after addition of saturating, unlabeled IQ peptide (red peaks).

1225 c, Overlay of  $^{15}\text{N}$ - $^1\text{H}$  HSQC spectra of  $^{15}\text{N}$ -labeled  $\alpha$ -actinin-1 C-lobe ( $\alpha$ -actinin-1 EF34;  
1226 residues 822-892) by itself (black peaks) and after addition of saturating, unlabeled IQ peptide  
1227 (red peaks).

1228 d, Overlay of  $^{15}\text{N}$ - $^1\text{H}$  HSQC spectra of  $^{15}\text{N}$ -labeled apoCaM by itself (black peaks) and after  
1229 addition of saturating, unlabeled IQ peptide (red peaks).

1230

1231 **Supplemental Figure 3. NMR structural analysis using residual dipolar couplings (RDCs).**  
1232 a,b,  $^{15}\text{N}$ - $^1\text{H}$  HSQC-IPAP spectra (Tjandra and Bax, 1997) of  $^{15}\text{N}$ -labeled  $\alpha$ -actinin-1\_EF34 (A)  
1233 or apoCaM (B) in the presence of saturating unlabeled IQ peptide. Representative and measured  
1234 RDC values are marked above selected peaks. Samples used in HSQC-IPAP experiments were  
1235 prepared by adding 5 mg of  $^{15}\text{N}$ -labeled protein to 0.5 mL of NMR buffer containing 12 mg/mL  
1236 of filamentous bacteriophage Pf1. HSQC-IPAP spectra were recorded in the presence of Pf1  
1237 (a,b) and absence of Pf1 (not shown). Residual dipolar couplings (RDCs) were measured (in Hz)  
1238 as the difference in splitting for the  $^{15}\text{N}$ - $^1\text{H}$  doublet components relative to the isotropic  $^1\text{J}_{\text{NH}}$   
1239 coupling. RDCs measured for 34 residues ( $\alpha$ -actinin-1\_EF34/IQ) and 36 residues (apoCaM/IQ)  
1240 served as orientational structural restraints applied during the refinement phase of the structure  
1241 calculation (Schwieters et al., 2003).  
1242 (C-D) Plots showing the correlation between observed versus calculated backbone RDCs  
1243 predicted from the final NMR derived structures for  $\alpha$ -actinin-1\_EF34/IQ and apoCaM/IQ,  
1244 respectively. The correlation coefficient ( $r^2$ ) equals 0.99 and Q is 0.095 and 0.089 for  $\alpha$ -actinin-  
1245 1\_EF34/IQ and apoCaM/IQ, respectively.  
1246

1247 **Supplemental Figure 4. Isothermal titration calorimetry of apoCaM added to IQ peptide.**

1248 a, Change of heat resulting from incremental addition of apoCaM (100  $\mu$ M stock solution) into  
1249 IQ peptide (10  $\mu$ M) during ITC titration at 27°C in 50 mM HEPES (pH 7.4), 100 mM KCl, 0.05  
1250 mM EGTA and 1 mM MgCl<sub>2</sub>.

1251 b, A binding isotherm of apoCaM binding to IQ peptide was derived from the integrated heat at  
1252 each injection after subtracting a blank titration (to remove heat of dilution). The binding  
1253 isotherm for apoCaM binding to IQ exhibited no detectable heat signal above the noise level,  
1254 consistent with low fractional binding under ITC conditions and/or low enthalpy caused by the  
1255 relatively weak binding affinity ( $K_d = 10 \mu$ M, see Fig. 2e and Table 4).

1256 c, Fluorescence polarization for binding of apoCaM (0.015 to 256  $\mu$ M) to fluorescein-labeled  
1257 WT IQ peptide (1.0  $\mu$ M) in the presence of 100 mM KCl (black squares) versus zero KCl (red  
1258 dots) at room temperature. The buffer was the same as in (a) except that KCl was excluded in the  
1259 zero KCl sample. The data were fit to a one-site model (dotted lines) with  $K_d = 10 \mu$ M in the  
1260 presence of 100 mM KCl and  $K_d = 2.6 \mu$ M in the absence of KCl.

1261

1262 **Supplemental Figure 5. Representative single channel recordings and assembly averages**  
1263 **for Cav1.2 WT, K1647A, F1648A, Y1649A, I1654A, F1658A, and K1662E.**

1264 HEK293 cells were transfected with  $\alpha_1$ 1.2,  $\alpha_2\delta$ -1, and  $\beta_{2A}$  before cell attached patch recording.  
1265 Holding potential (HP) was -80 mV and test potential (TP) 0 mV. Shown are 20 consecutive  
1266 sweeps from representative experiments (top) and mean assembly averages for all experiments  
1267 for Cav1.2 WT and each mutant.

1268 a, Cav1.2 WT versus K1647A, F1648A, Y1649A

1269 b, Cav1.2 WT versus I1654A, F1658A, and K1662E.

1270 Cav1.2 WT in and K1647A are replicated from Fig. 3 a,b for comparison with the other Cav1.2  
1271 mutants.

1272

1273 **Supplemental Figure 6. Effects of Cav1.2 IQ mutants on single channel properties.**  
1274 HEK293 cells were transfected with  $\alpha_11.2$ ,  $\alpha_2\delta-1$ , and  $\beta_{2A}$  before cell attached patch recording.  
1275 Shown are dot plots and means  $\pm$  SEM (whiskers) for availability (a), NPo (b), Po (c), the mean  
1276 of the currents calculated from the ensemble averages of each experiment (d), and single channel  
1277 conductances i (e) for Cav1.2 WT, K1647A, F1648A, Y1649A, I1654A, F1658A, and K1662E  
1278 (\*\*p<0.01, \*\*\*p<0.001 compared to WT; one-way ANOVA with Bonferroni post-hoc test (a) or  
1279 Welch ANOVA with Tamhane T2 test (b-e).  
1280

1281 **Supplemental Figure 7. Effects of overexpression of  $\alpha$ -actinin-1 on single channel**  
1282 **properties of WT Cav1.2.**

1283 HEK293 cells were transfected with WT  $\alpha_1$ 1.2,  $\alpha_2\delta$ -1, and  $\beta_{2A}$  plus, if indicated,  $\alpha$ -actinin-1 WT  
1284 or E847K/E851K before cell attached patch recording.

1285 Shown are dot plots and means  $\pm$  SEM (whiskers) for availability (a), NPo (b), Po (c), the mean  
1286 of the currents calculated from the ensemble averages of each experiment (d), and single channel  
1287 conductances i (e; \*p<0.05, \*\*p<0.01, \*\*\*p<0.001; unpaired t-test).

1288

1289 **Supplemental Figure 8.  $\alpha$ -Actinin-1 E847K/E851K rescues open probability for Cav1.2**  
1290 **K1647E.**

1291 HEK293 cells were transfected with K1647E  $\alpha_1$ 1.2,  $\alpha_2\delta$ -1, and  $\beta_{2A}$  plus  $\alpha$ -actinin-1 WT or  
1292 E847K/E851K before cell attached patch recording.

1293 Shown are dot plots and means  $\pm$  SEM (whiskers) for availability (a), NPo (b), Po (c), the mean  
1294 of the currents calculated from the ensemble averages of each experiment (d), and single channel  
1295 conductances i (e; \*\*p<0.01; unpaired t-test).

1296

1297 **Supplemental Figure 9. Cav1.2 mutations that affect  $\alpha$ -actinin-1 impair gating charge**  
1298 **movement and its coupling to channel opening.**

1299 HEK293 cells were transfected with  $\alpha_11.2$ ,  $\alpha_2\delta-1$ , and  $\beta_{2A}$  before whole cell patch recording in  
1300 20 mM Ba<sup>2+</sup>.

1301 a, Dot plots and means  $\pm$  SEM (whiskers) of Q<sub>on</sub> determined at reversal potential (see Fig. 7 for  
1302 details; \*p<0.05; \*\*p<0.01; one-way ANOVA with Bonferroni post-hoc test).

1303 b, I-V curves. Currents were recorded upon depolarization from a holding potential of -80 mV to  
1304 increasingly more positive potentials (insert on left). Shown are peak currents. Dashed lines  
1305 indicate SEM. The WT Cav1.2 curve is reproduced in all graphs for the Cav1.2 mutants.

1306 c, G-V curves. Tail currents (I<sub>Tail</sub>) were recorded upon repolarization to -50 mV following  
1307 depolarization from a holding potential of -80 mV to increasingly more positive potentials.  
1308 Shown are fitted curves in top panels and dot blots in bottom panels.

1309



1310 **Supplemental Figure 10. IQ peptide binds with opposite polarity to  $\alpha$ -actinin-1 versus**  
1311 **apoCaM.**  
1312 a, NMR structure of  $\alpha$ -actinin-1 (cyan) bound to Cav1.2 IQ motif (red).  
1313 b, NMR structure of apoCaM (cyan) bound to Cav1.2 IQ motif (red).  
1314 c, NMR structure apoCaM (cyan) bound to the Nav1.2 IQ motif (red). PDB accession number is  
1315 2KXW (Feldkamp et al., 2011). Non-conserved intermolecular contacts between hydrophobic  
1316 side chain atoms are colored yellow. The  $\beta$ -methyl side chain atoms of Nav1.2 residues A1909  
1317 and A1915 are 2.5Å away from side chain methyl atoms of apoCaM residues M109 and L85,  
1318 respectively. The aromatic side chain atoms of Nav1.2 residue Y1919 are 3.3 Å away from  
1319 aromatic side chain atoms of apoCaM residue F141.  
1320 a-c, Black arrows depict directionality of the IQ helix.  
1321 d, Amino acid sequence alignment of IQ motifs from Nav1.2, Nav1.5, and Cav1.2. Residues that  
1322 are conserved between Nav and Cav are shown in boldface font. Lysine residues in Cav1.2 that  
1323 form intermolecular salt bridges in the Cav1.2 IQ peptide complexes with  $\alpha$ -actinin-1\_EF3/4 and  
1324 apoCaM and are not conserved between the Ca<sup>2+</sup> and Na<sup>2+</sup> channels are colored red.  
1325

1326 **Supplemental Figure 11. Structural modeling addressing the function of Y1649 in the  $\alpha_1$ 1.2**  
1327 **IQ motif and how the E851K mutation of  $\alpha$ -actinin affects its binding to the IQ motif**

1328 a, Y1649 stabilizes the  $\alpha$ -helical conformation of the  $\alpha_1$ 1.2 IQ motif and thereby  $\alpha$ -actinin  
1329 binding. Shown is a cartoon representation of  $\alpha_1$ 1.2 IQ motif  $\alpha$ -helix (orange) and  $\alpha$ -actinin-1  
1330 EF3-EF4 (blue). Sidechains of key residues are depicted as stick representation and labeled.  
1331 Y1649 is in close proximity to L1653, which is about one  $\alpha$ -helical turn downstream of Y1649.  
1332 Stabilization of this  $\alpha$  helix ensures correct positioning of I1654, which is critical for binding to  
1333  $\alpha$ -actinin. This figure was created using UCSF Chimera (Pettersen et al., 2004).

1334 b-d, The lysine residue in the E851K mutation of  $\alpha$ -actinin destabilizes the canonical EF hand  
1335 structure. Conformers of the lysine residues when used to substitute E851 by itself or together  
1336 with E847 in  $\alpha$ -Actinin-1 and of the glutamate residue when used to substitute K1647 in the IQ  
1337 motif were calculated for the structure of the complex between the IQ motif of  $\alpha_1$ 1.2 and  
1338 EF3\_EF4 of  $\alpha$ -Actinin-1 using the UCSF Chimera rotamer tool (Pettersen et al., 2004). The  
1339  $\alpha_1$ 1.2 IQ  $\alpha$ -helix is shown in orange and the  $\alpha$ -actinin-1 EF3-EF4 in blue. Sidechains of key  
1340 residues are depicted as stick representation and labeled. The lysine rotamers (thin sticks) are  
1341 overlaid on top of the original E851 and E847 residues and the glutamate rotamers on top of the  
1342 original K1647 residue.

1343 b, Simulation of rotamers for the E851K mutation in  $\alpha$ -actinin-1 to show possible conformations  
1344 of the lysine sidechain.

1345 c, Simulation of rotamers for the E851K mutation in  $\alpha$ -actinin-1 and the K1647E mutation in  
1346  $\alpha_1$ 1.2 to show possible conformations of the lysine and glutamate sidechains.

1347 d, Simulation of rotamers for the E847K and E851K mutations in  $\alpha$ -actinin-1 and the K1647E  
1348 mutation in  $\alpha_1$ 1.2 to show possible conformations of the lysine and glutamate sidechains.

1349

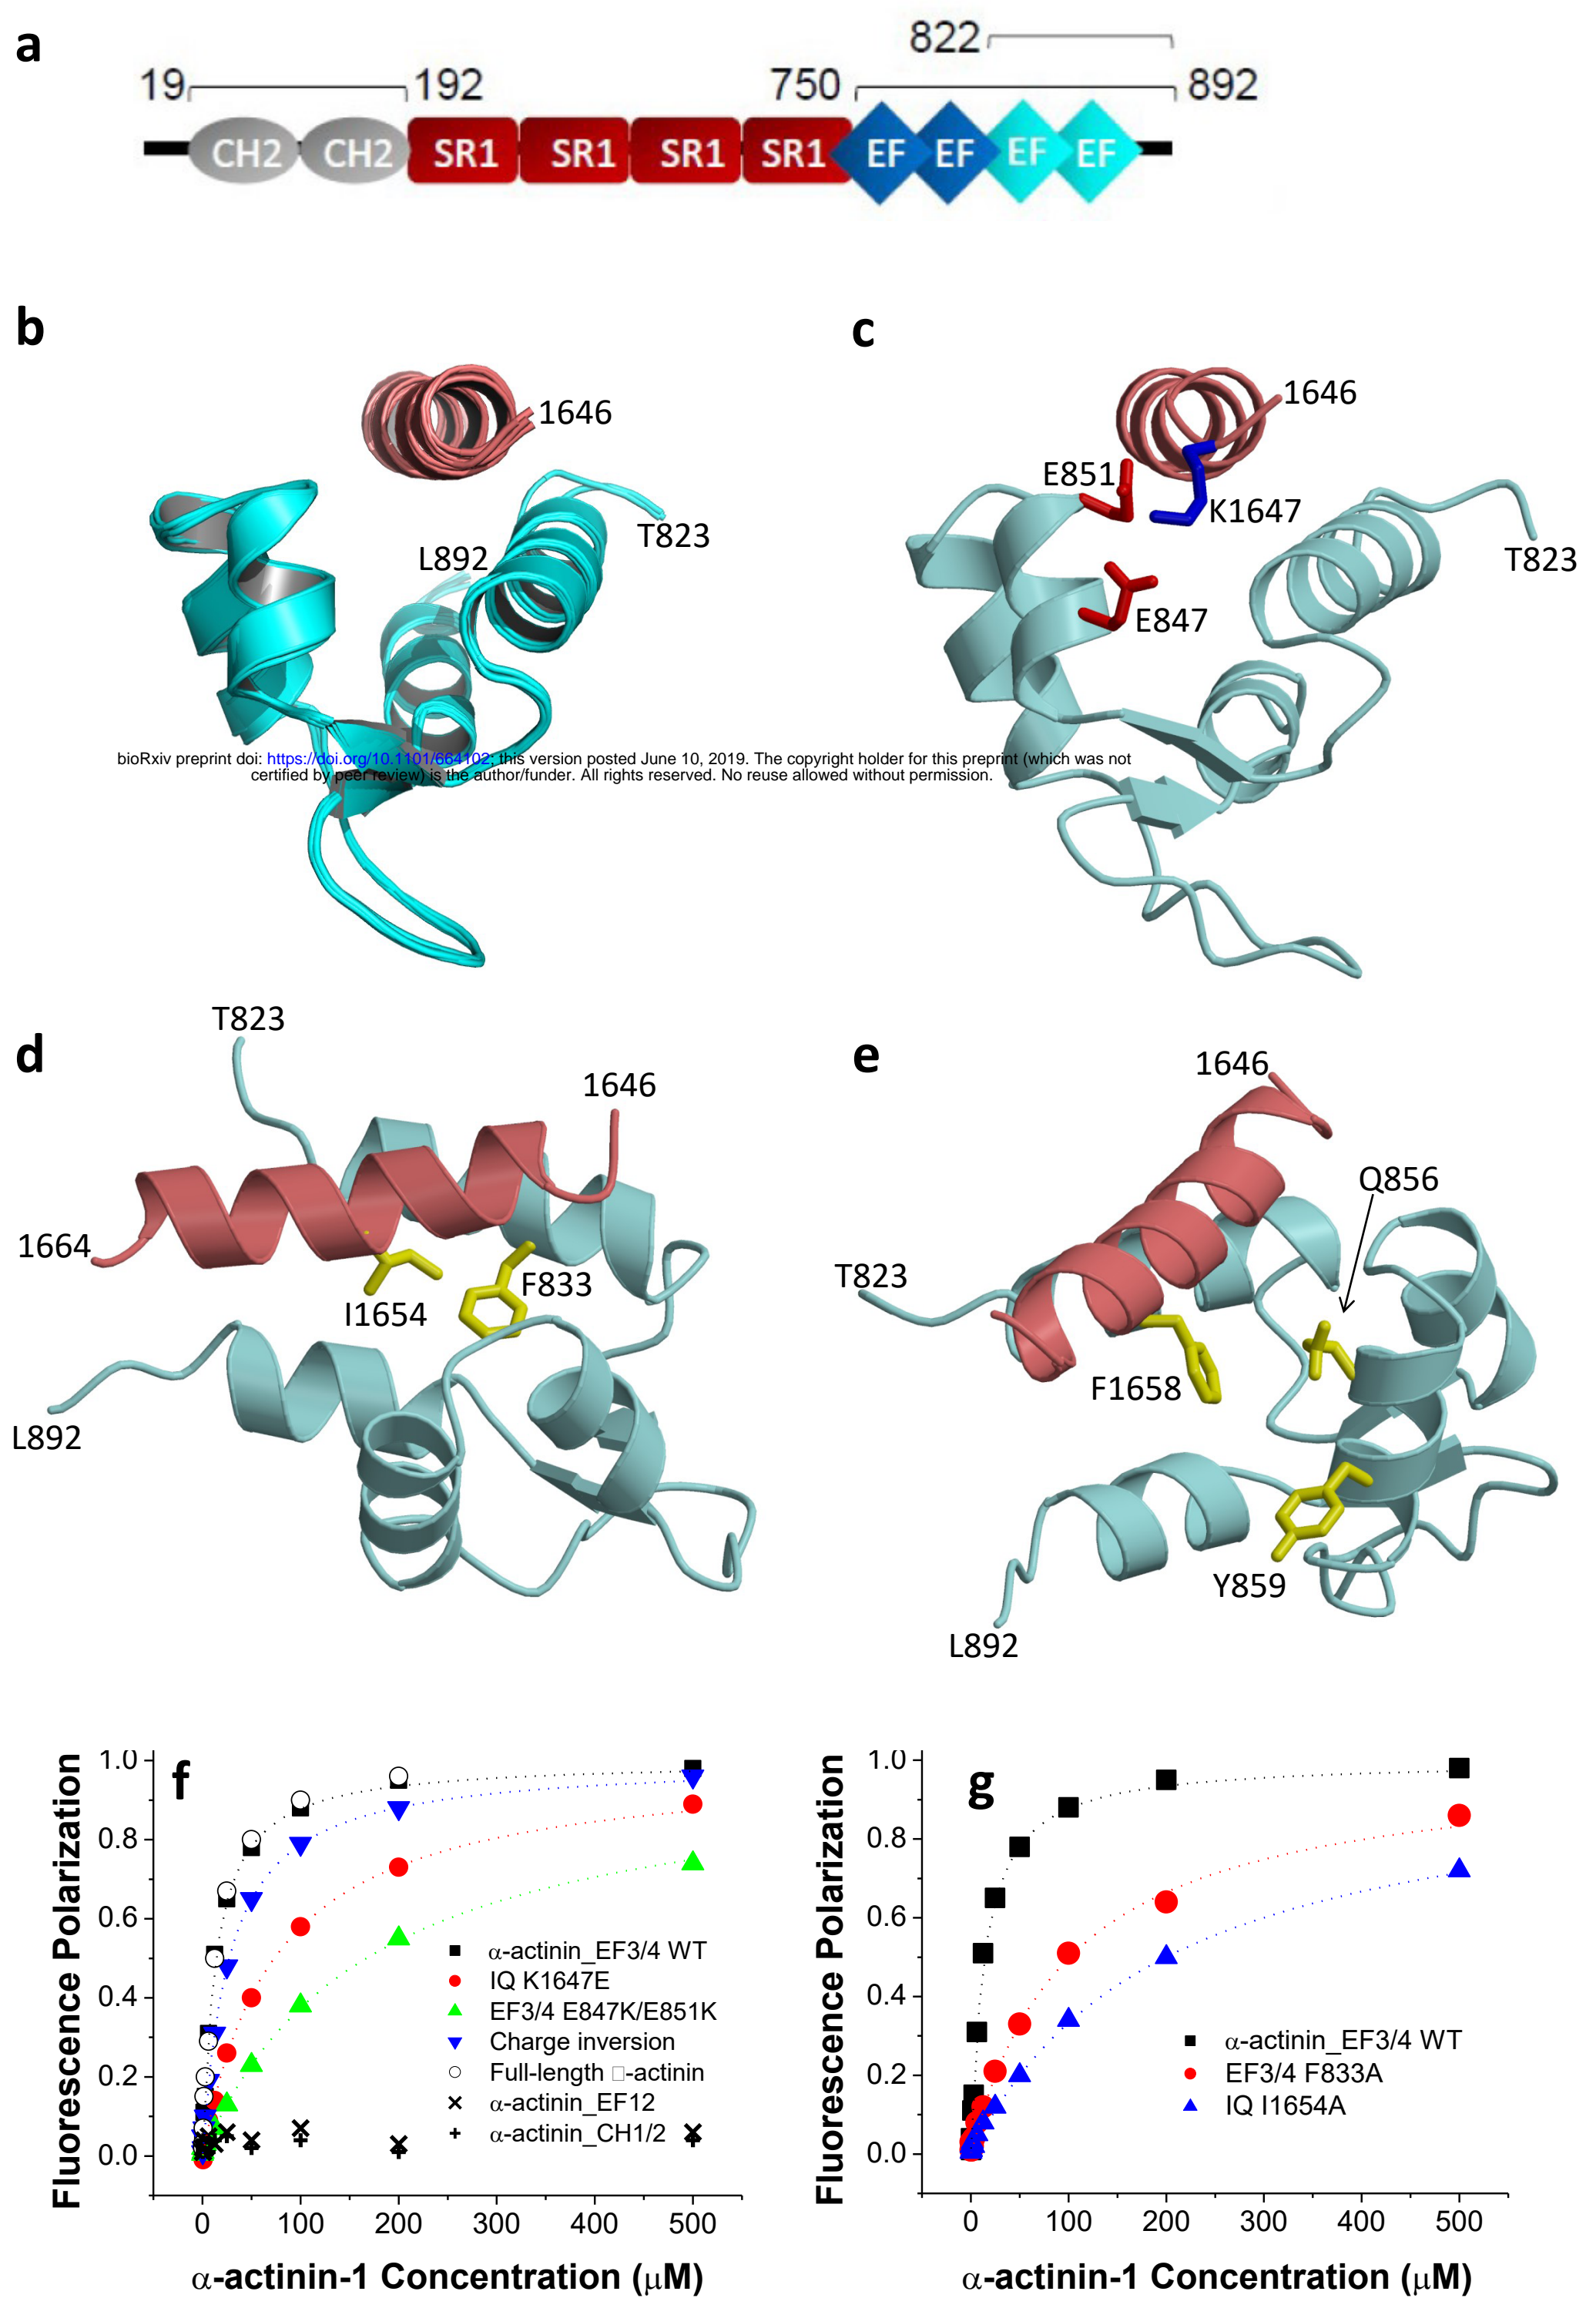

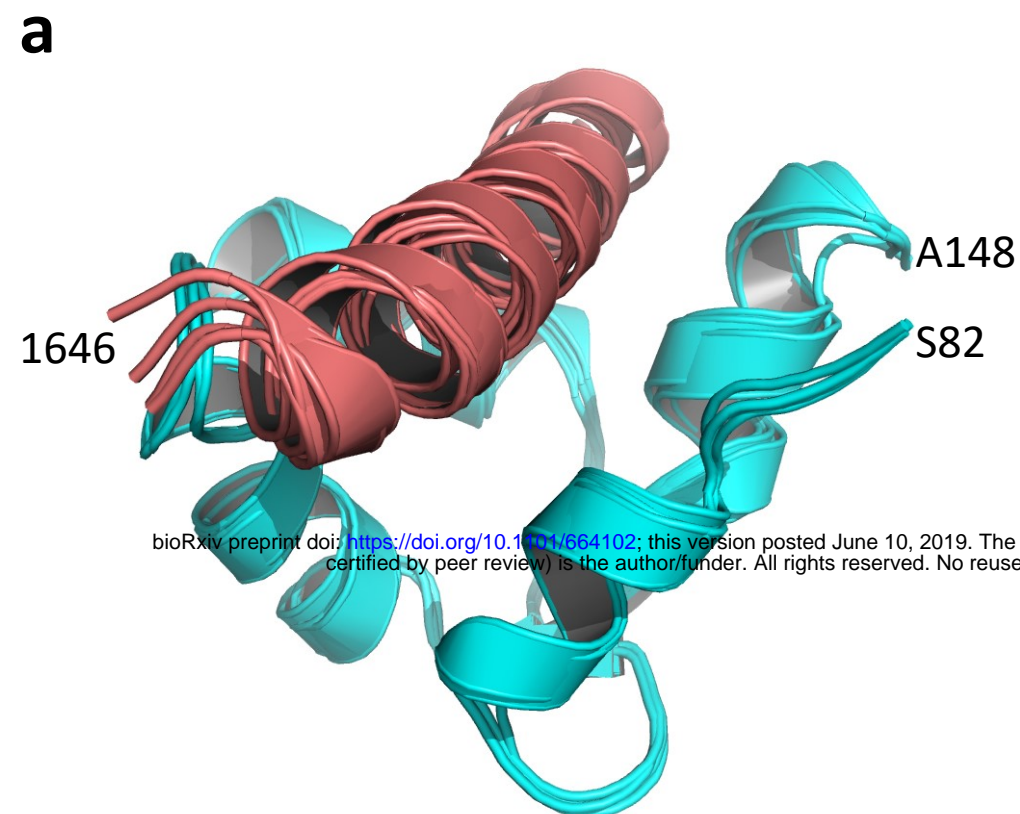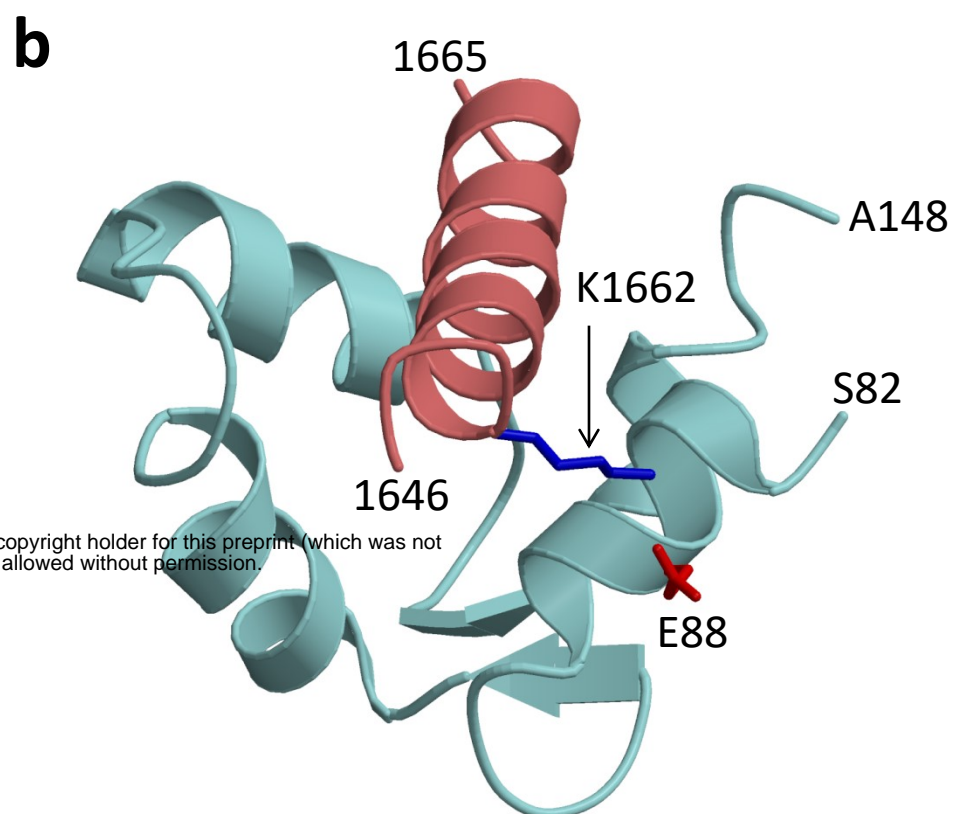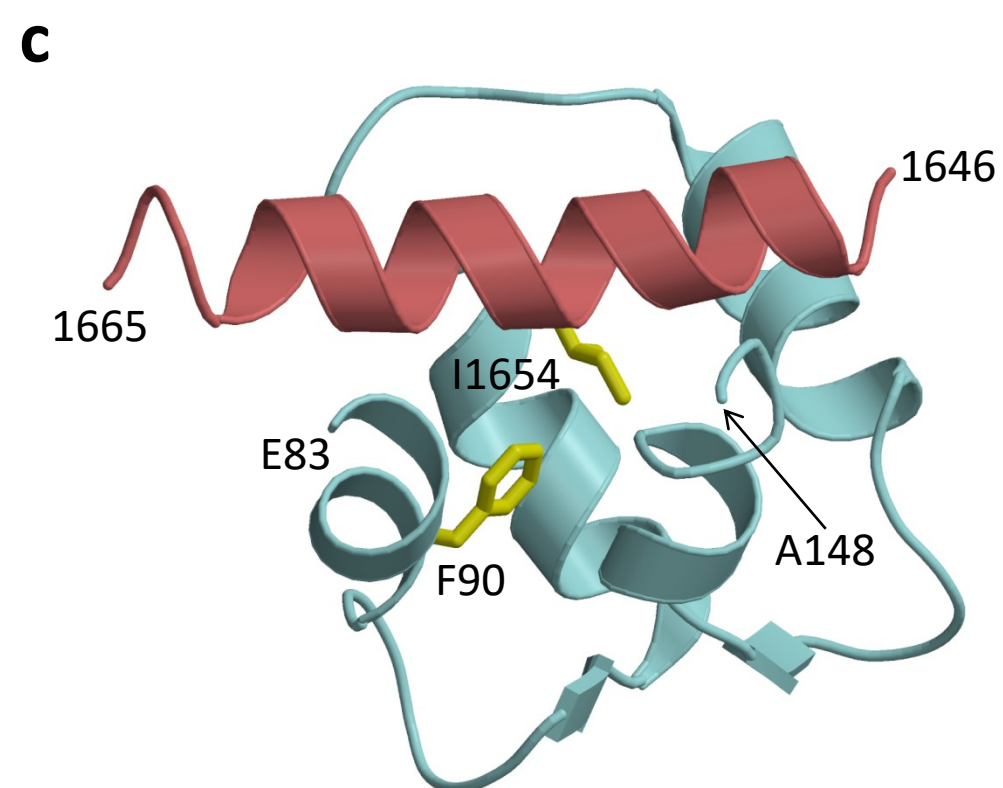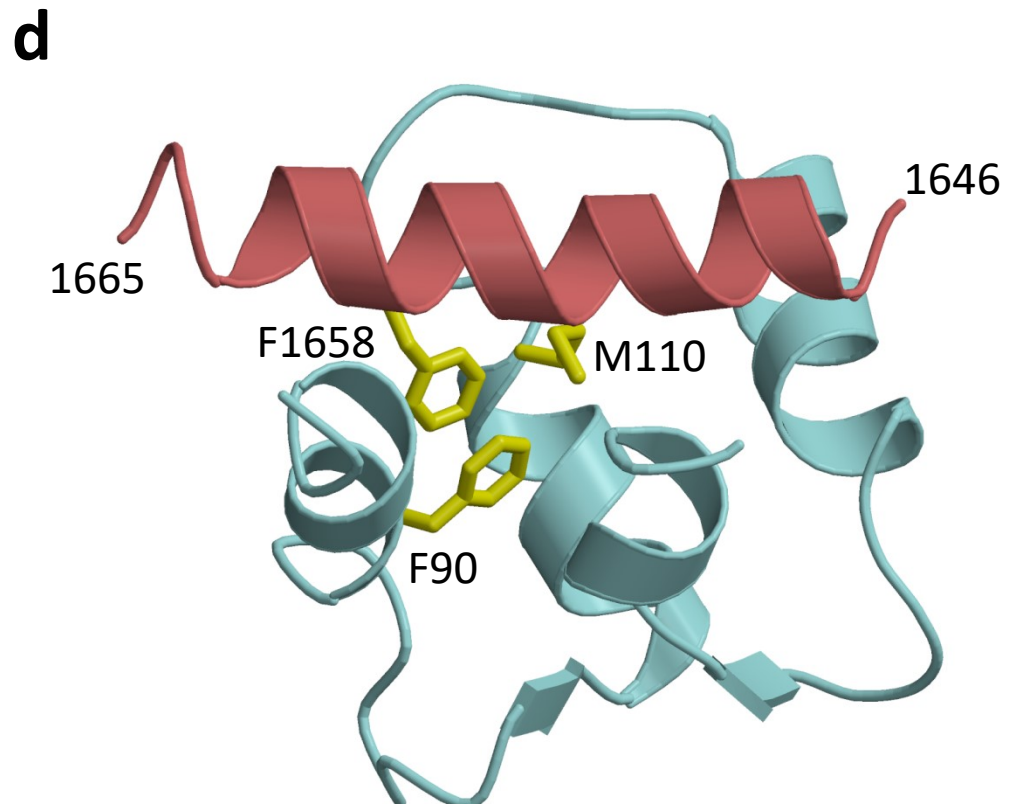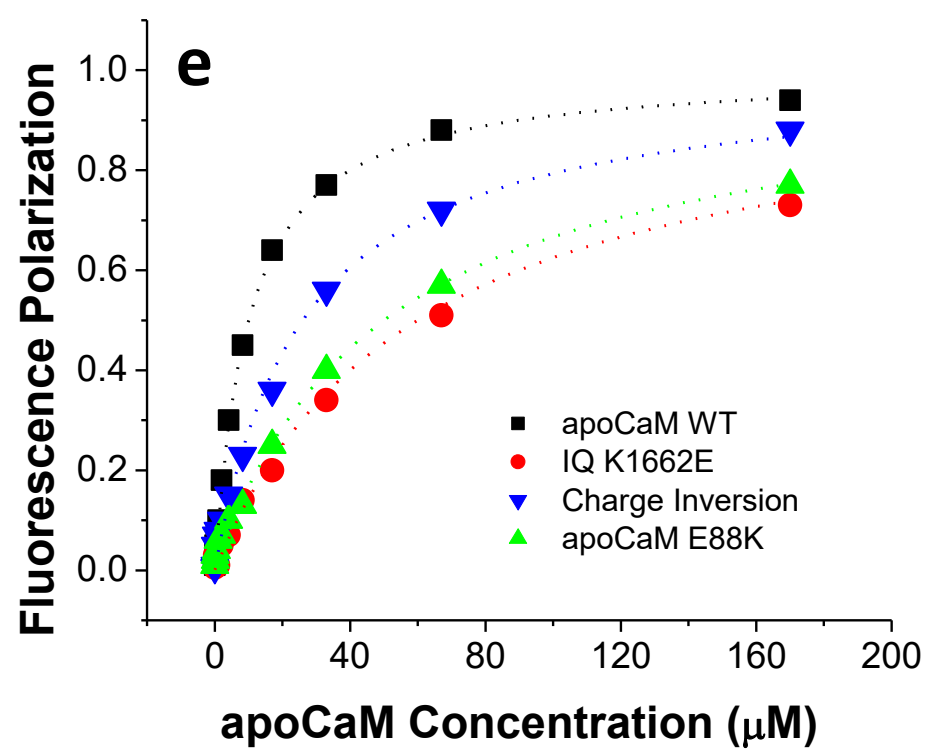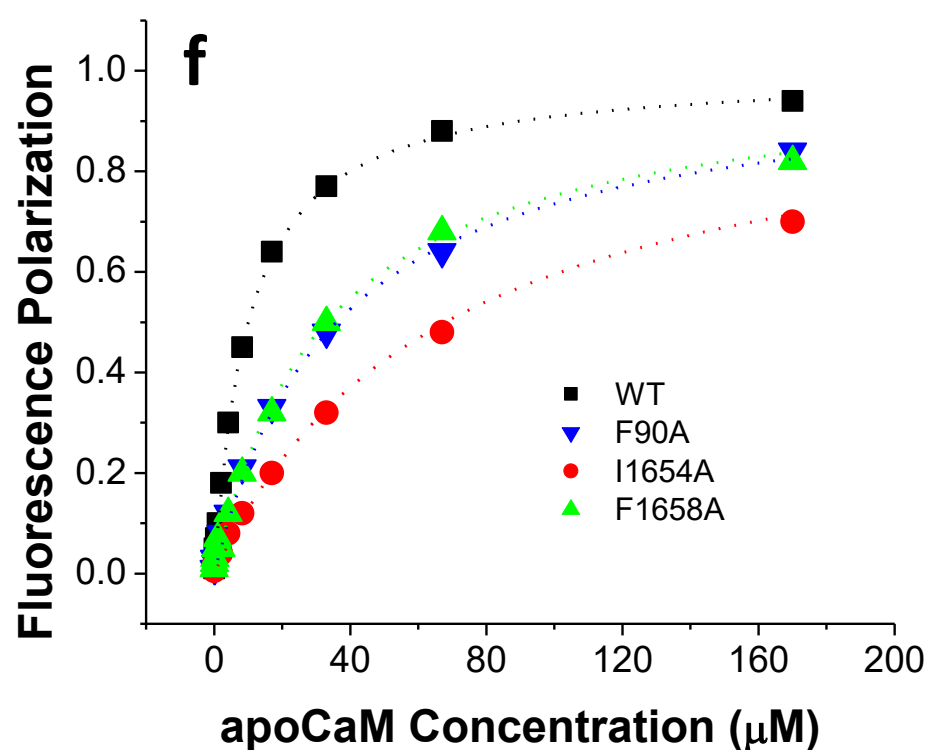

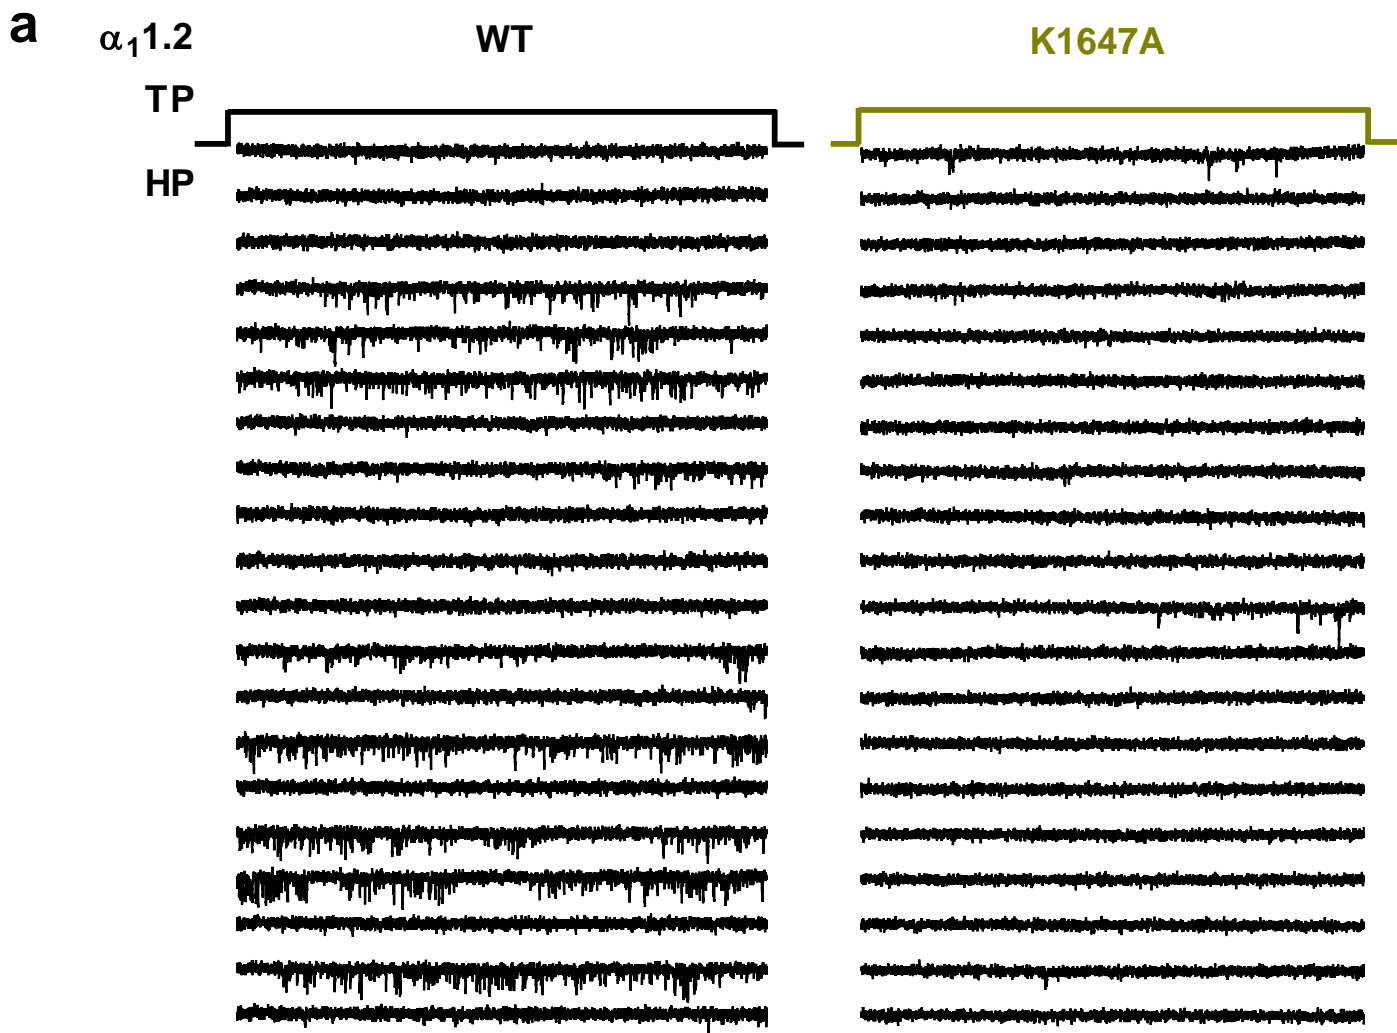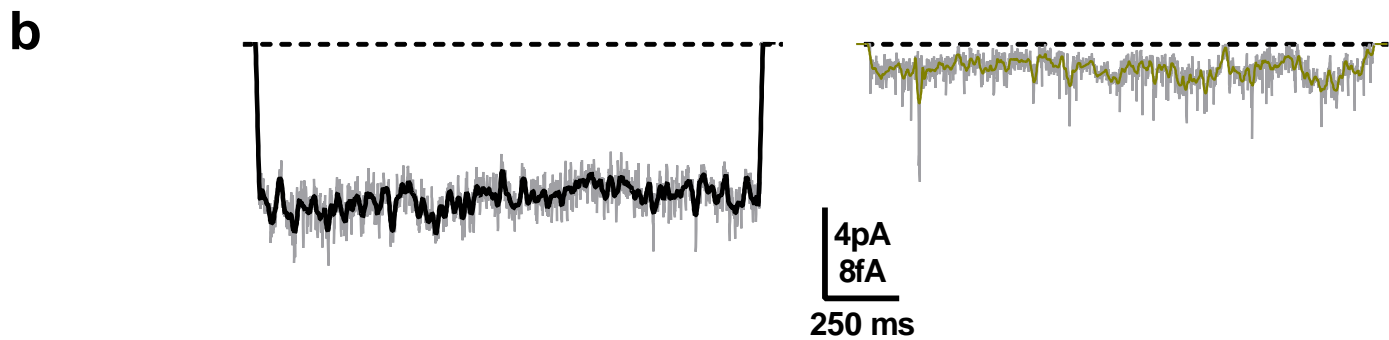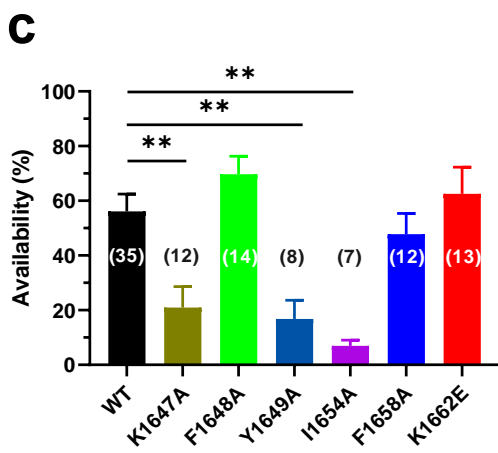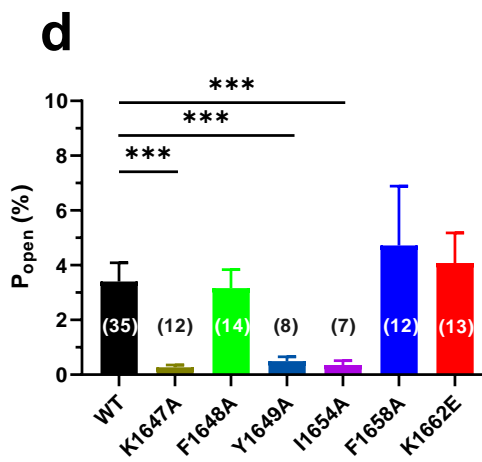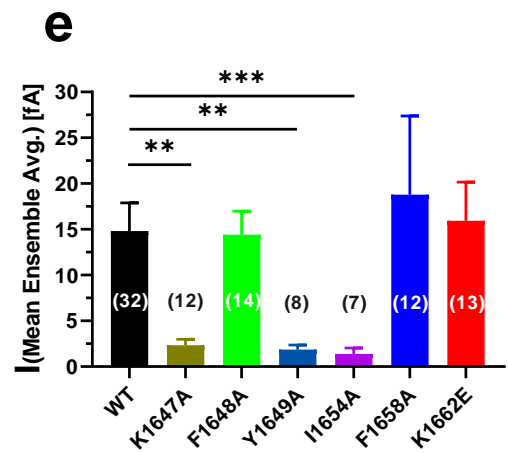

**a**

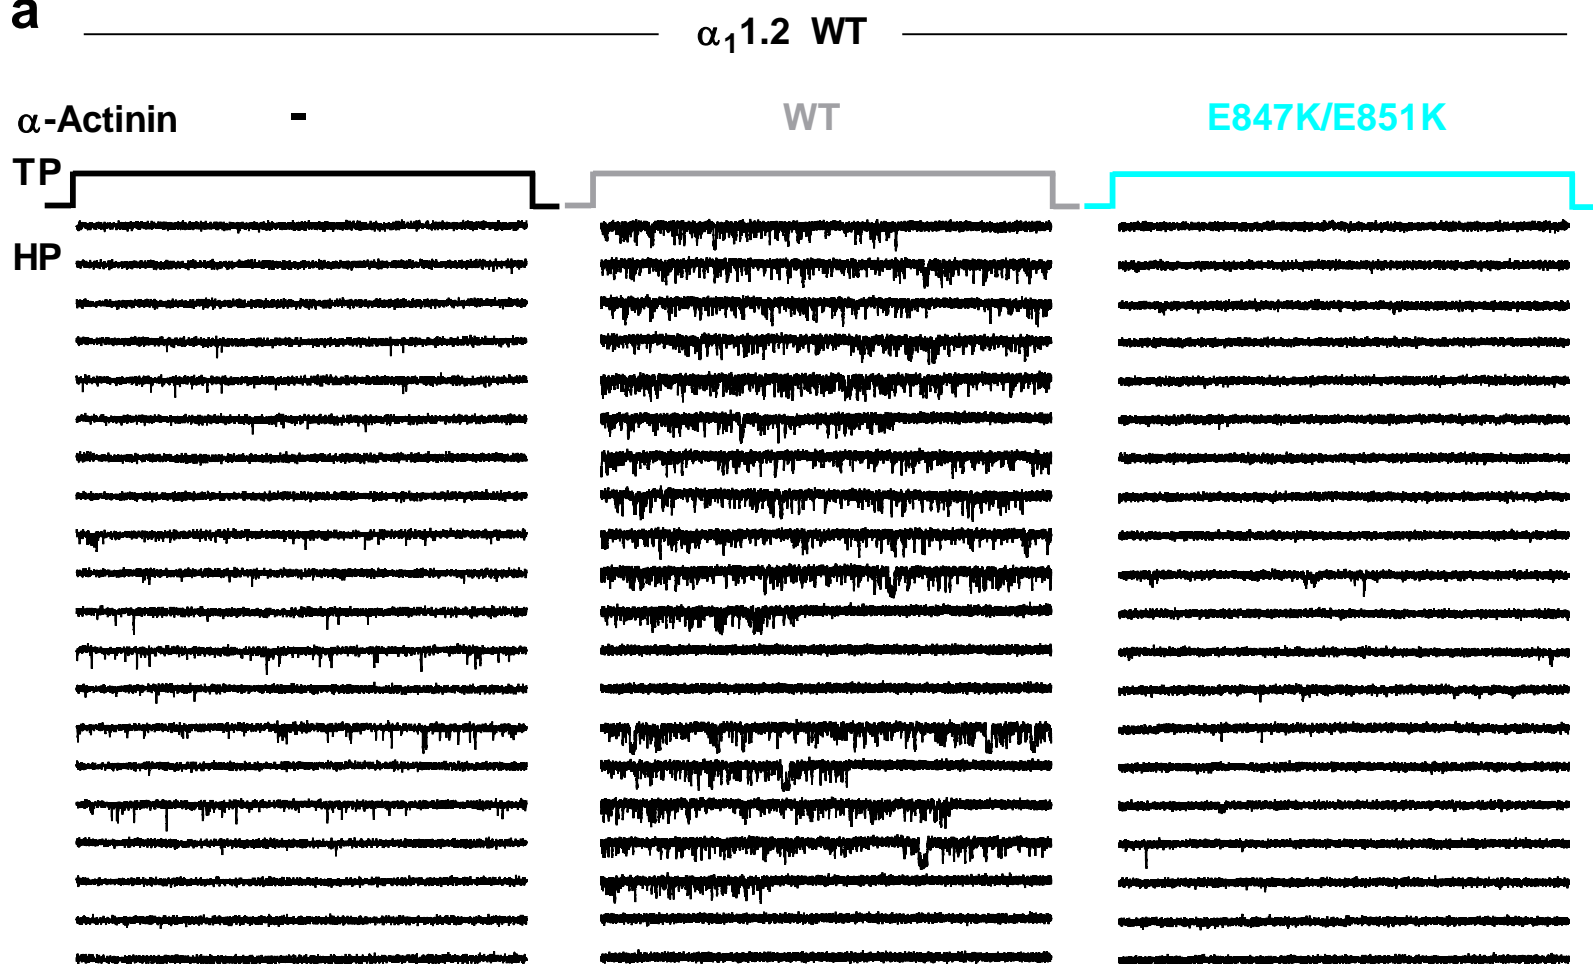

**b**

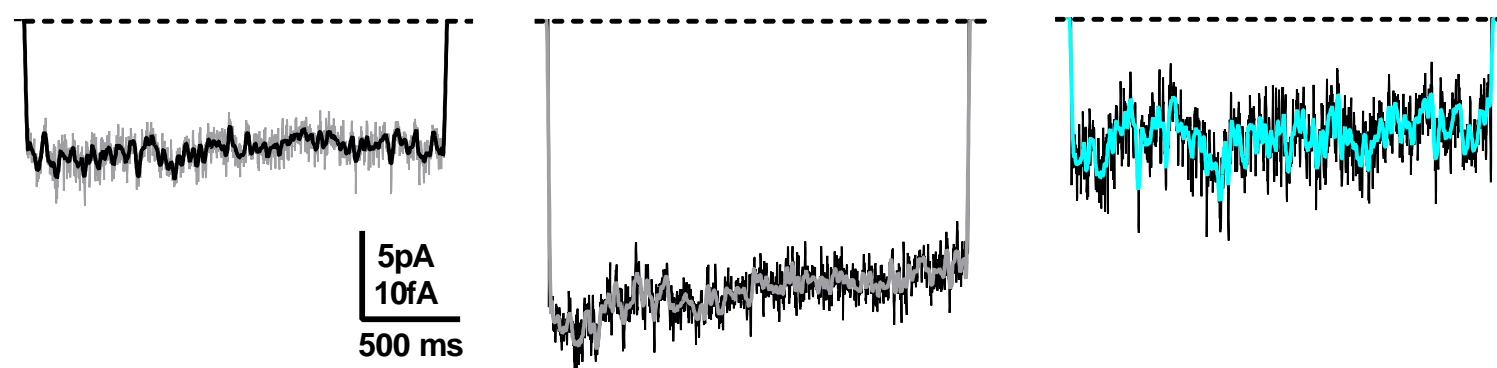

**c**

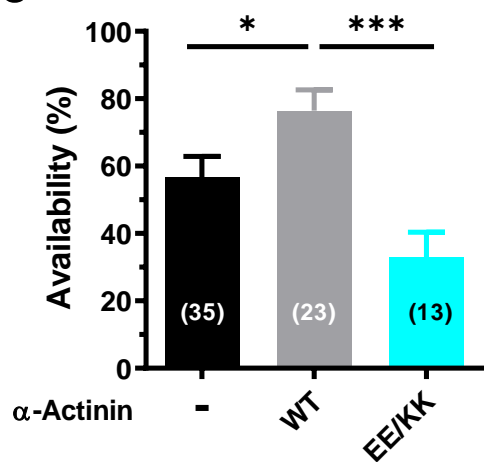

**d**

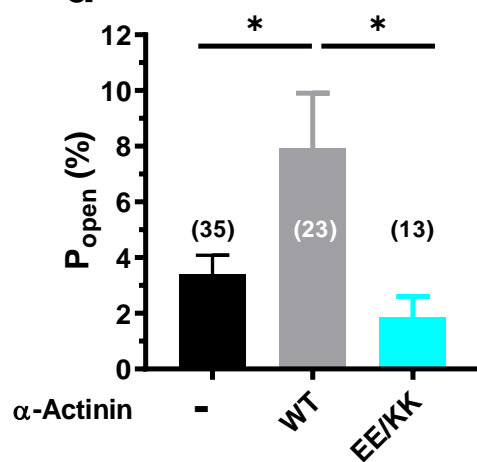

**e**

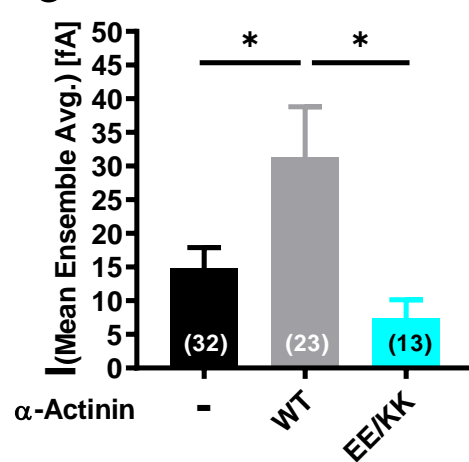

**a** $\alpha_11.2$  1647E $\alpha$ -Actinin

WT

E847K/E851K

TP

HP

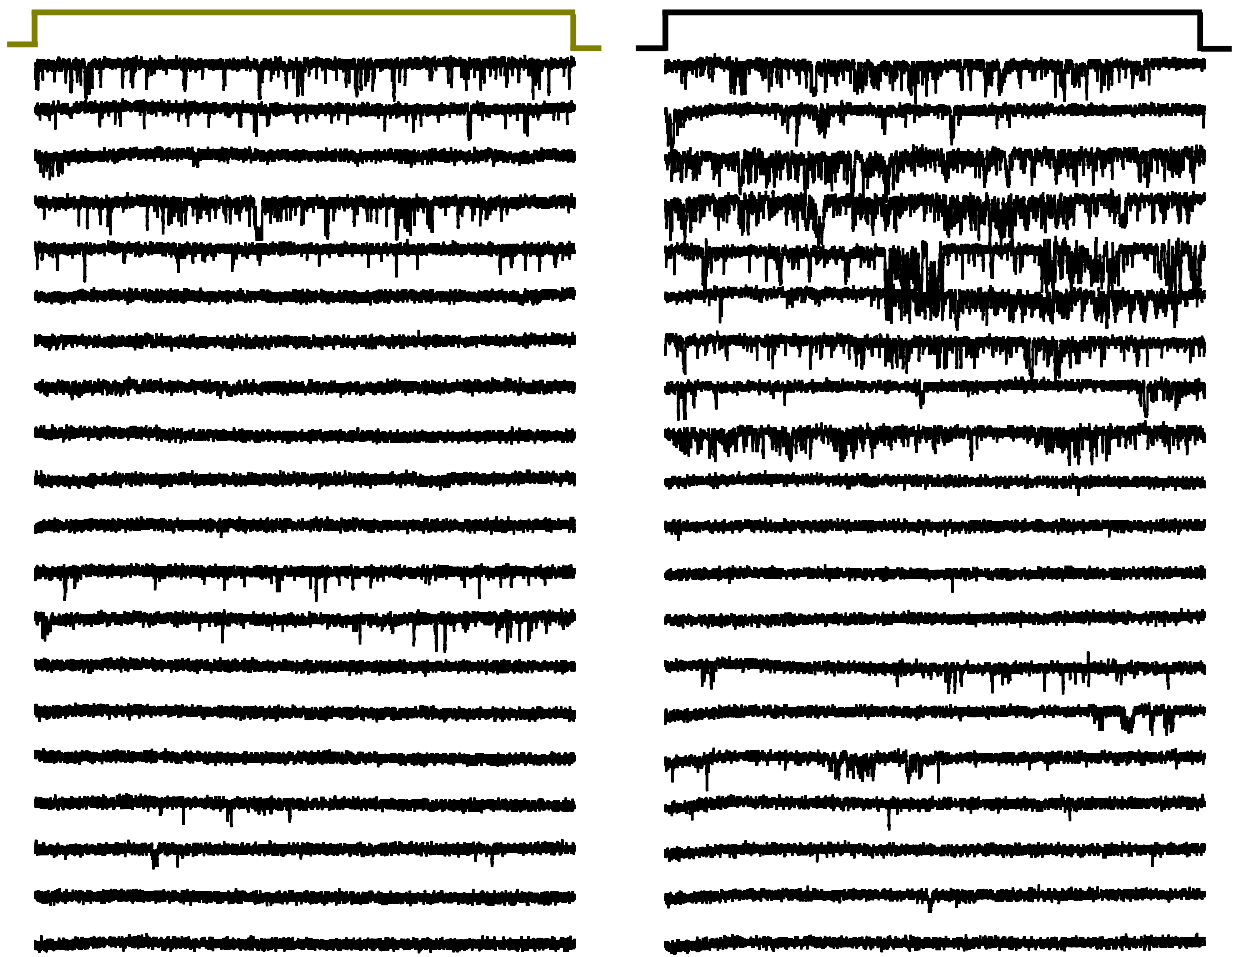**b**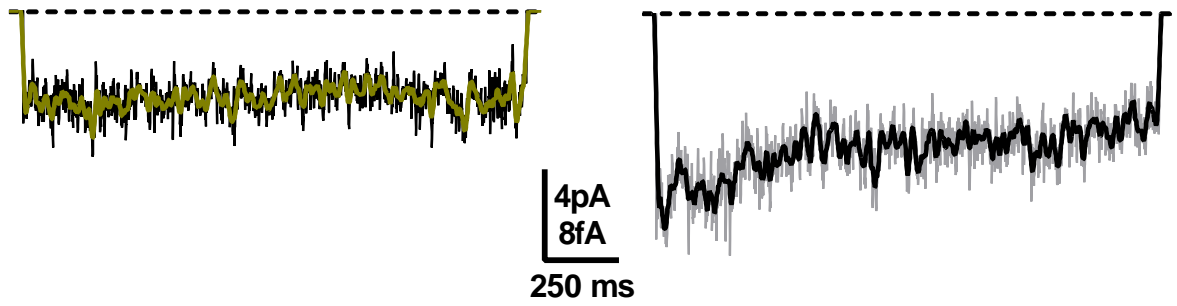**c**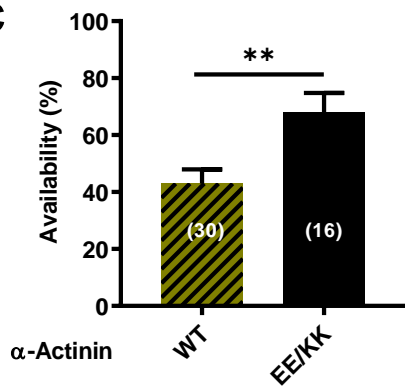**d**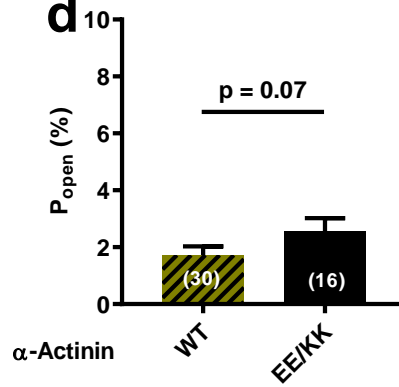**e**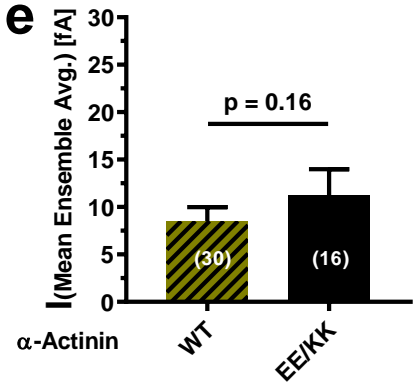

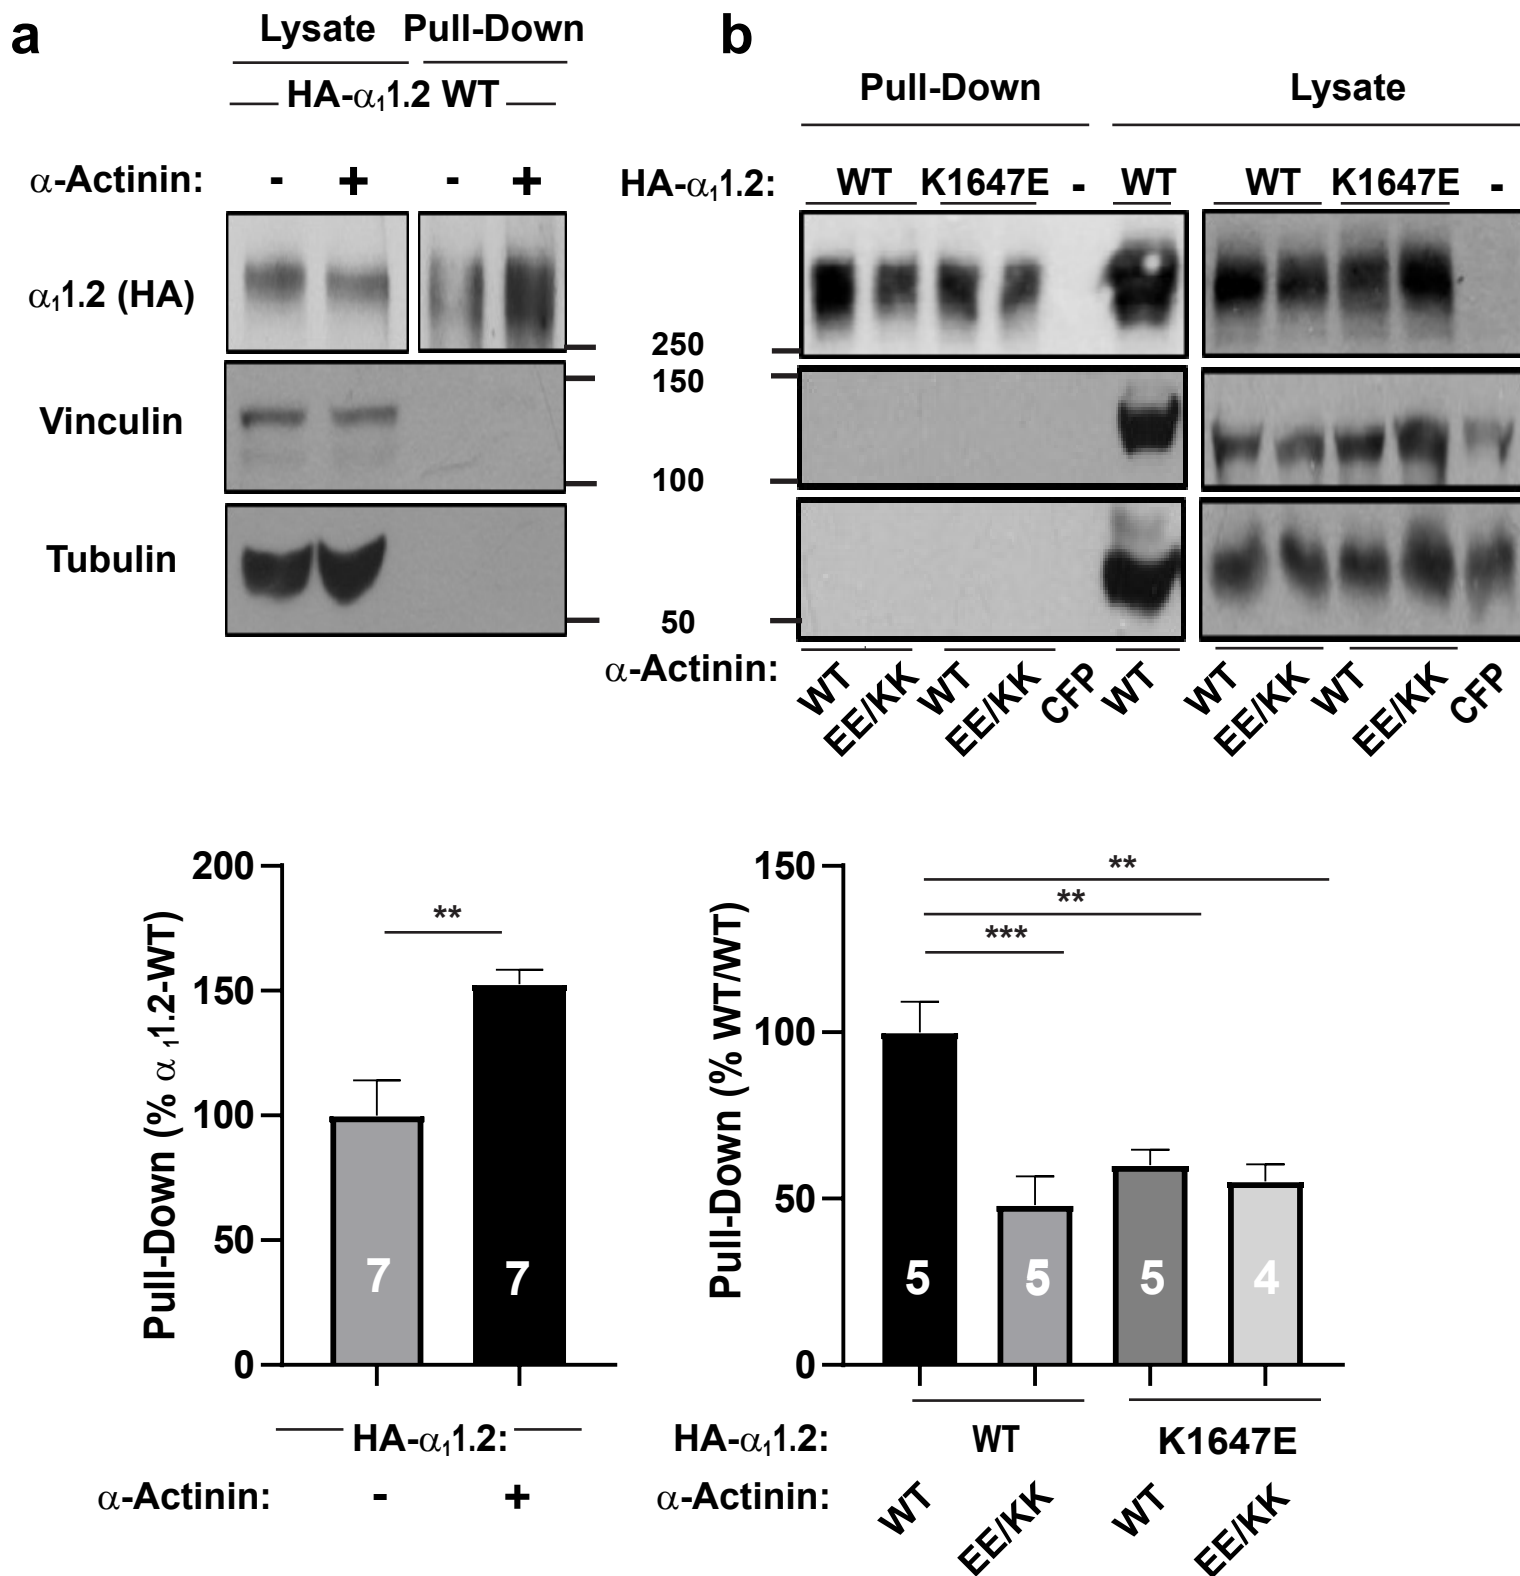



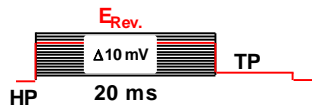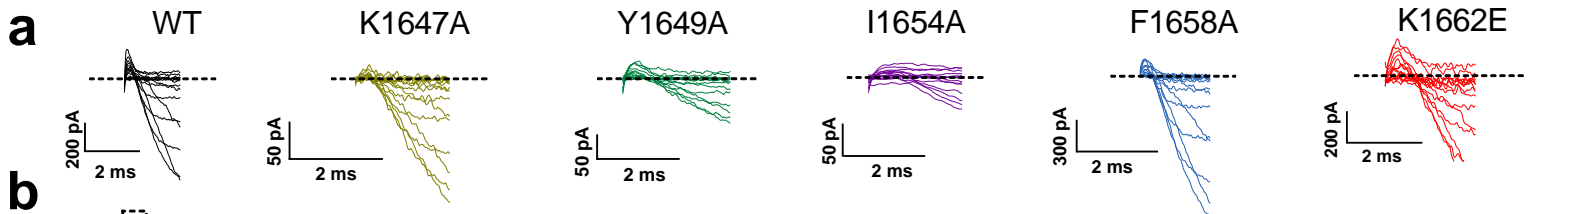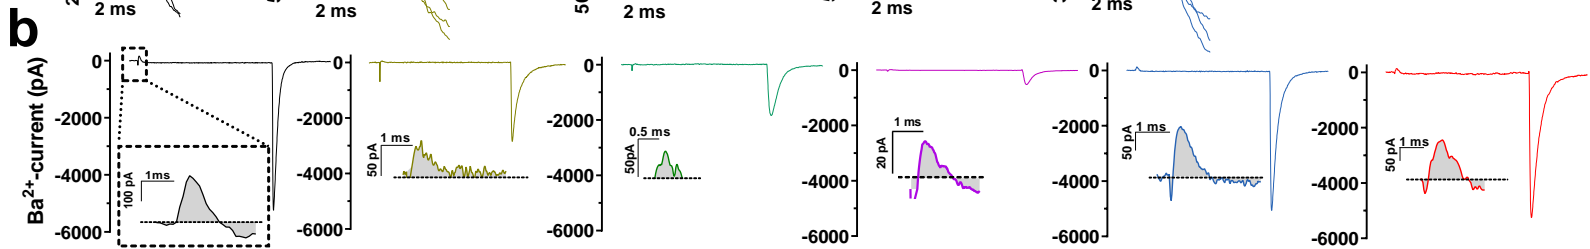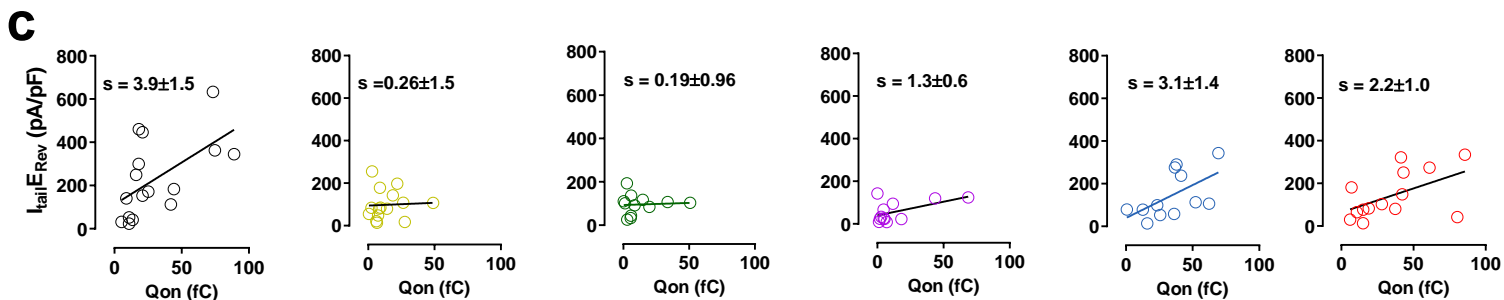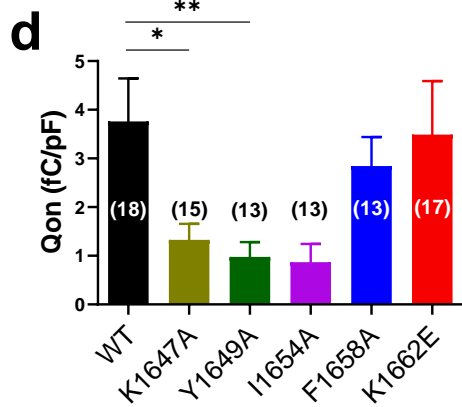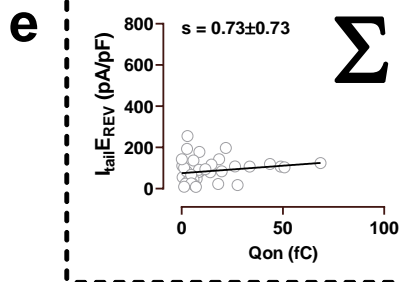

Source: https://www.biorxiv.org/content/10.1101/664102v1.full.pdf
